# Supplementary material for: Dataset of stable isotopes of precipitation in the Eurasian continent
Source: Copernicus journal article supplement (doi:10.5194/essd-16-1543-2024), 2024-03-21
Supplement: Supplementary file 1 [file essd-16-1543-2024-supplement.pdf]

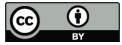

*Supplement of*

## **Dataset of stable isotopes of precipitation in the Eurasian continent**

**Longhu Chen et al.**

*Correspondence to:* Guofeng Zhu (zhugf@nwnu.edu.cn)

The copyright of individual parts of the supplement might differ from the article licence.

**Table S1** Precipitation Stable Isotope Site Information

| Site_Name                     | Latitude | Longitude | Elevation (m) | Earliest Collection Date | Latest Collection Date | Data Source       |
|-------------------------------|----------|-----------|---------------|--------------------------|------------------------|-------------------|
| 10-TG-16w                     | 32.9159  | 91.9596   | 5126.0000     | 2008.01.01               | 2008.01.01             | WaterIsotopes.org |
| 12QH18                        | 34.4752  | 97.7328   | 4413.0000     | 2012.05.05               | 2012.05.05             | WaterIsotopes.org |
| A CORUNA                      | 43.3659  | -8.4214   | 58.0000       | 2000.02.15               | 2016.12.15             | GNIP              |
| Aba                           | 31.9300  | 101.7200  |               | 2021.07.06               | 2022.04.04             | Measured data     |
| ADANA                         | 36.9800  | 35.3000   | 73.0000       | 1990.01.15               | 2016.12.15             | GNIP              |
| ADZ SG RF                     | 1.2953   | 103.7711  |               | 2015.03.06               | 2015.03.27             | WaterIsotopes.org |
| Akita                         | 39.4300  | 140.8000  | 10.0000       | 2013.01.27               | 2014.01.03             | WaterIsotopes.org |
| Akita-kita                    | 39.4800  | 140.2000  | 20.0000       | 2013.02.01               | 2014.01.07             | WaterIsotopes.org |
| Aktumsuk                      | 45.0918  | 59.3451   |               | 2006.03.15               | 2006.03.15             | WaterIsotopes.org |
| ALEPPO                        | 36.1833  | 37.2167   | 410.0000      | 1989.12.15               | 1992.05.15             | GNIP              |
| ALEXANDRIA                    | 31.1833  | 29.9500   | 7.0000        | 1961.10.15               | 2004.04.15             | GNIP              |
| ALMERIA AEROPUERTO            | 36.8464  | -2.3569   | 21.0000       | 2000.04.15               | 2016.12.15             | GNIP              |
| ALOR STAR                     | 6.2000   | 100.4000  | 5.0000        | 1992.02.15               | 2016.12.15             | GNIP              |
| ALTNABREAC                    | 58.3833  | -3.7000   | 155.0000      | 1981.08.15               | 1982.08.15             | GNIP              |
| AMDERMA                       | 69.7667  | 61.6833   | 53.0000       | 1981.01.15               | 1989.09.15             | GNIP              |
| AMMAN-WAJ                     | 31.9577  | 35.8483   | 900.0000      | 1999.01.15               | 2018.12.15             | GNIP              |
| ANCONA-MONTE D'AGO            | 43.5870  | 13.5153   | 170.0000      | 2000.10.15               | 2018.11.15             | GNIP              |
| ANDALO                        | 46.1667  | 11.0000   | 1005.0000     | 1999.09.30               | 1999.09.30             | WaterIsotopes.org |
| ANIP, HZB Nr. 101287          | 47.3883  | 11.2631   | 990.0000      | 1993.01.15               | 2002.12.15             | WaterIsotopes.org |
| ANIP, HZB Nr. 102343          | 47.0000  | 11.5167   | 1450.0000     | 1991.01.15               | 2000.12.15             | WaterIsotopes.org |
| ANIP, HZB Nr. 103820          | 47.5961  | 13.1644   | 470.0000      | 2007.01.15               | 2013.12.15             | WaterIsotopes.org |
| ANIP, HZB Nr. 105734 (Schule) | 47.8040  | 13.7766   | 425.0000      | 1973.01.15               | 1983.12.15             | WaterIsotopes.org |
| ANIP, HZB Nr. 105908          | 47.3467  | 13.3950   | 910.0000      | 2007.01.15               | 2013.12.15             | WaterIsotopes.org |

|                                                    |         |         |           |            |            |                       |
|----------------------------------------------------|---------|---------|-----------|------------|------------|-----------------------|
| ANIP, HZB Nr.<br>110551                            | 47.8517 | 16.8431 | 121.0000  | 2004.01.15 | 2013.12.15 | WaterIsotop<br>es.org |
| ANIP, HZB Nr.<br>110569                            | 47.7431 | 16.8433 | 119.0000  | 1990.01.15 | 1999.10.15 | WaterIsotop<br>es.org |
| ANIP, HZB Nr.<br>113324, St. Peter i.<br>Katschtal | 47.0283 | 13.5981 | 1220.0000 | 2007.01.15 | 2013.12.15 | WaterIsotop<br>es.org |
| ANIP, HZB Nr.<br>113498                            | 46.4896 | 14.5900 | 550.0000  | 2007.01.15 | 2013.12.15 | WaterIsotop<br>es.org |
| ANIP, HZB Nr.<br>113886 Seeberg                    | 46.4225 | 14.5422 | 940.0000  | 2007.01.15 | 2013.12.15 | WaterIsotop<br>es.org |
| ANIP, HZB Nr.<br>114173 Flughafen                  | 46.6484 | 14.3185 | 447.0000  | 2004.01.15 | 2013.12.15 | WaterIsotop<br>es.org |
| ANIP, HZB-Nr.<br>100552                            | 47.3115 | 10.0177 | 835.0000  | 2004.01.15 | 2013.12.15 | WaterIsotop<br>es.org |
| ANIP, HZB-Nr.<br>100776 Rieden                     | 47.4886 | 9.7366  | 410.0000  | 2004.01.15 | 2012.12.15 | WaterIsotop<br>es.org |
| ANIP, HZB-Nr.<br>101238 Reutte                     | 47.4833 | 10.7500 | 870.0000  | 2007.01.15 | 2013.12.15 | WaterIsotop<br>es.org |
| ANIP, HZB-Nr.<br>101345                            | 47.5333 | 11.7000 | 904.0000  | 1996.01.15 | 2002.12.15 | WaterIsotop<br>es.org |
| ANIP, HZB-Nr.<br>102210 Obergurgl                  | 46.8667 | 11.0333 | 1940.0000 | 2007.01.15 | 2011.12.15 | WaterIsotop<br>es.org |
| ANIP, HZB-Nr.<br>102236                            | 47.0764 | 10.9700 | 1180.0000 | 2007.01.15 | 2013.12.15 | WaterIsotop<br>es.org |
| ANIP, HZB-Nr.<br>102327 Flughafen                  | 47.2575 | 11.3539 | 580.0000  | 2007.01.15 | 2014.12.15 | WaterIsotop<br>es.org |
| ANIP, HZB-Nr.<br>102418<br>Patscherkofel           | 47.2088 | 11.4618 | 2245.0000 | 2005.01.15 | 2009.10.15 | WaterIsotop<br>es.org |
| ANIP, HZB-Nr.<br>102814                            | 47.5833 | 12.1667 | 495.0000  | 2010.01.15 | 2014.12.15 | WaterIsotop<br>es.org |
| ANIP, HZB-Nr.<br>102939                            | 47.2500 | 10.8833 | 695.0000  | 1994.10.15 | 2002.12.15 | WaterIsotop<br>es.org |
| ANIP, HZB-Nr.<br>103853 Flughafen                  | 47.7942 | 13.0017 | 430.0000  | 2007.01.15 | 2013.12.15 | WaterIsotop<br>es.org |
| ANIP, HZB-Nr.<br>104323 Braunau                    | 48.2539 | 13.0767 | 360.0000  | 2005.01.15 | 2013.12.15 | WaterIsotop<br>es.org |
| ANIP, HZB-Nr.<br>105130                            | 47.6000 | 13.7833 | 640.0000  | 1996.01.15 | 2002.12.15 | WaterIsotop<br>es.org |
| ANIP, HZB-Nr.<br>105296 Feuerkogel                 | 47.8167 | 13.7239 | 1618.0000 | 2007.01.15 | 2013.12.15 | WaterIsotop<br>es.org |
| ANIP, HZB-Nr.<br>105684                            | 47.9044 | 13.5722 | 469.0000  | 2007.01.15 | 2013.12.15 | WaterIsotop<br>es.org |

|                                           |         |          |           |            |            |                       |
|-------------------------------------------|---------|----------|-----------|------------|------------|-----------------------|
| ANIP, HZB-Nr.<br>106542 Breitenau         | 47.8464 | 14.3569  | 514.0000  | 2005.01.15 | 2013.12.15 | WaterIsotop<br>es.org |
| ANIP, HZB-Nr.<br>106567 Planneralm        | 47.4048 | 14.2009  | 1605.0000 | 2009.01.15 | 2013.12.15 | WaterIsotop<br>es.org |
| ANIP, HZB-Nr.<br>107011 Lackenhof         | 47.8700 | 15.1539  | 807.0000  | 2009.01.15 | 2012.09.15 | WaterIsotop<br>es.org |
| ANIP, HZB-Nr.<br>107607 Ottenstein        | 48.5836 | 15.3408  | 554.0000  | 2007.01.15 | 2013.12.15 | WaterIsotop<br>es.org |
| ANIP, HZB-Nr.<br>107979 Hohe Warte        | 48.2486 | 16.3563  | 198.0000  | 2005.01.15 | 2014.12.15 | WaterIsotop<br>es.org |
| ANIP, HZB-Nr.<br>108456                   | 47.8769 | 15.8934  | 495.0000  | 2007.01.15 | 2013.12.15 | WaterIsotop<br>es.org |
| ANIP, HZB-Nr.<br>112599 Karlgraben        | 47.6823 | 15.5627  | 775.0000  | 2008.01.15 | 2013.12.15 | WaterIsotop<br>es.org |
| ANIP, HZB-Nr.<br>113001                   | 46.7454 | 12.4078  | 1075.0000 | 2009.01.15 | 2013.12.15 | WaterIsotop<br>es.org |
| ANIP, HZB-Nr.<br>113498 Villacher<br>Alpe | 46.6036 | 13.6728  | 2120.0000 | 2007.01.15 | 2013.12.15 | WaterIsotop<br>es.org |
| ANIP, HZB-Nr.<br>113522                   | 46.6246 | 13.6867  | 907.0000  | 1993.01.15 | 2002.12.15 | WaterIsotop<br>es.org |
| ANIP, HZB-Nr.<br>114280 St. Michael       | 46.5586 | 14.7670  | 527.0000  | 1993.01.15 | 2002.12.15 | WaterIsotop<br>es.org |
| ANIP, HZB-Nr.<br>WEISSBACH                | 47.5833 | 12.7000  | 629.0000  | 1983.01.15 | 1989.12.15 | WaterIsotop<br>es.org |
| ANip,<br>HZB-Nr.106252                    | 47.6544 | 14.9809  | 610.0000  | 2007.01.15 | 2013.12.15 | WaterIsotop<br>es.org |
| ANIP, Wasseralm<br>HZB Nr. 110155         | 47.7350 | 15.6484  | 774.0000  | 1989.01.15 | 1998.12.15 | WaterIsotop<br>es.org |
| ANKARA                                    | 39.9500 | 32.8800  | 902.0000  | 1990.01.15 | 2016.12.15 | GNIP                  |
| ANTALYA                                   | 36.8800 | 30.7000  | 49.0000   | 1990.01.15 | 2016.12.15 | GNIP                  |
| ANY                                       | 35.7475 | 138.4166 | 526.0000  | 2010.07.15 | 2015.06.15 | WaterIsotop<br>es.org |
| Aomori                                    | 40.4900 | 140.4500 | 5.0000    | 2013.01.30 | 2014.01.01 | WaterIsotop<br>es.org |
| AQABA                                     | 29.5500 | 34.9000  | 2.0000    | 2002.01.15 | 2002.01.15 | GNIP                  |
| Arakawa                                   | 35.4300 | 139.4500 | 20.0000   | 2013.02.06 | 2013.12.28 | WaterIsotop<br>es.org |
| ARKHANGELSK                               | 64.5800 | 40.5000  | 13.0000   | 1981.02.15 | 1990.11.15 | GNIP                  |
| ARKONA                                    | 54.6789 | 13.4342  | 42.0000   | 1997.06.15 | 2008.07.15 | GNIP                  |
| ARMAGH<br>OBSERVATORY                     | 54.3533 | -6.6483  | 64.0000   | 2012.05.15 | 2019.12.15 | GNIP                  |
| Artashat                                  | 39.9322 | 44.5214  | 820.8000  | 2014.07.06 | 2015.04.28 | WaterIsotop           |

|                                  |         |          |           |            |            |                       |
|----------------------------------|---------|----------|-----------|------------|------------|-----------------------|
|                                  |         |          |           |            |            | es.org                |
| ARTERN                           | 51.3744 | 11.2919  | 164.0000  | 1997.06.15 | 2013.12.15 | GNIP                  |
| ASTRAKHAN                        | 46.2500 | 48.0300  | -18.0000  | 1981.01.15 | 2000.12.15 | GNIP                  |
| AT_0007                          | 47.7351 | 15.6486  |           | 2005.06.07 | 2005.08.11 | WaterIsotop<br>es.org |
| AT_0007_007                      | 47.7351 | 15.6486  |           | 2005.06.04 | 2005.06.04 | WaterIsotop<br>es.org |
| AT_0141                          | 47.7267 | 13.0354  | 510.0000  | 2012.05.25 | 2012.12.04 | WaterIsotop<br>es.org |
| AT_0144                          | 47.7215 | 12.9843  | 1396.0000 | 2012.05.25 | 2012.10.10 | WaterIsotop<br>es.org |
| AT_1203                          | 46.7156 | 13.0404  | 1391.0000 | 1995.01.01 | 1995.10.01 | WaterIsotop<br>es.org |
| AT_1207                          | 46.6762 | 12.9966  | 705.0000  | 1995.02.01 | 1995.09.01 | WaterIsotop<br>es.org |
| AT_2088                          | 48.5239 | 16.7556  | 205.0000  | 2009.01.15 | 2013.12.15 | WaterIsotop<br>es.org |
| AT_2338                          | 48.3297 | 14.2586  | 490.0000  | 2009.01.15 | 2013.12.15 | WaterIsotop<br>es.org |
| AT_2402                          | 47.0868 | 13.1151  | 1120.0000 | 1988.01.15 | 1997.12.15 | WaterIsotop<br>es.org |
| AT_2433                          | 47.0777 | 15.4489  | 366.0000  | 2004.01.15 | 2013.12.15 | WaterIsotop<br>es.org |
| AT_2434                          | 47.6409 | 13.8919  | 710.0000  | 2011.01.15 | 2013.12.15 | WaterIsotop<br>es.org |
| AT_2704                          | 48.1833 | 16.4000  | 156.4800  | 2015.01.23 | 2020.5.16  | WaterIsotop<br>es.org |
| ATHENS-PENDELI                   | 38.0501 | 23.8667  | 498.0000  | 2001.01.15 | 2018.12.15 | GNIP                  |
| AVIGNON                          | 43.9128 | 4.8888   | 33.0000   | 1997.04.15 | 2018.12.15 | GNIP                  |
| Ayouqui weather<br>station (AYQ) | 39.2200 | 101.6800 | 1620.0000 | 2013.07.12 | 2017.07.08 | WaterIsotop<br>es.org |
| BAB-JANET                        | 35.5722 | 36.1897  | 1100.0000 | 1992.12.15 | 1993.04.15 | GNIP                  |
| BAD SALZUFLEN                    | 52.1042 | 8.7519   | 135.0000  | 1990.01.15 | 2011.12.15 | GNIP                  |
| BAGDARIN                         | 54.4667 | 113.5833 | 903.0000  | 1996.04.15 | 2000.10.15 | GNIP                  |
| BAHRAIN                          | 26.2700 | 50.6200  | 2.0000    | 1970.01.15 | 2018.10.15 | GNIP                  |
| Baiyin                           | 36.5400 | 104.1740 |           | 2020.07.25 | 2021.07.02 | Measured<br>data      |
| BAKURIANI                        | 41.7333 | 43.5167  | 1665.0000 | 2008.03.15 | 2018.12.15 | GNIP                  |
| BALAS-BALAS                      | 9.2900  | 123.1700 | 827.0000  | 1997.01.15 | 1998.12.15 | GNIP                  |
| BALTI                            | 47.7000 | 27.8833  | 231.0000  | 2007.09.15 | 2015.08.15 | GNIP                  |
| BANDARBAN                        | 22.2000 | 92.2000  | 24.0000   | 2015.03.15 | 2018.09.15 | GNIP                  |
| BANGKOK                          | 13.7300 | 100.5000 | 2.0000    | 1990.01.15 | 2015.11.15 | GNIP                  |
| Baoji                            | 34.3693 | 107.1449 |           | 2020.10.14 | 2021.11.10 | Measured              |

|              |         |          |           |            |            |                   |
|--------------|---------|----------|-----------|------------|------------|-------------------|
|              |         |          |           |            |            | data              |
| Baoshan      | 25.0800 | 99.1000  |           | 2021.05.06 | 2022.01.14 | Measured data     |
| BAOTOU       | 40.6700 | 109.8500 | 1067.0000 | 1986.03.15 | 1992.10.15 | GNIP              |
| Baotou       | 40.6500 | 109.8300 |           | 2021.05.13 | 2021.08.03 | Measured data     |
| BARABINSK    | 55.3333 | 78.3667  | 120.0000  | 1996.06.15 | 2000.12.15 | GNIP              |
| BARI         | 41.1333 | 16.8500  | 24.0000   | 2001.12.31 | 2001.12.31 | WaterIsotopes.org |
| BARISAL      | 22.7000 | 90.3600  | 10.0000   | 2013.05.15 | 2018.10.15 | GNIP              |
| Barisal      | 22.7210 | 90.3520  |           | 2013.05.06 | 2015.12.19 | WaterIsotopes.org |
| BASOVIZZA    | 45.6439 | 13.8639  | 397.0000  | 1999.01.31 | 1999.01.31 | WaterIsotopes.org |
| BATTIPAGLIA  | 40.6167 | 14.9667  | 71.0000   | 2001.05.31 | 2001.05.31 | WaterIsotopes.org |
| Bayan Nur    | 40.7574 | 107.4170 |           | 2021.05.22 | 2021.09.15 | Measured data     |
| BAYIR        | 30.7619 | 36.6769  | 902.0000  | 1968.11.15 | 1968.11.15 | GNIP              |
| BEEK         | 50.9200 | 5.7800   | 111.0000  | 1981.01.15 | 1992.04.15 | GNIP              |
| BEER SHEVA   | 31.2300 | 34.7800  | 270.0000  | 1965.11.15 | 1968.01.15 | GNIP              |
| BELGAUM      | 15.8806 | 74.4933  | 747.0000  | 2003.08.15 | 2005.10.15 | GNIP              |
| BELLINZAGO   | 45.5667 | 8.6333   | 190.0000  | 2000.12.31 | 2000.12.31 | WaterIsotopes.org |
| BERLIN       | 52.4672 | 13.4019  | 48.0000   | 1990.01.15 | 2012.12.15 | GNIP              |
| BERN         | 46.9522 | 7.4393   | 511.0000  | 1990.01.15 | 2012.12.15 | GNIP              |
| BET DAGAN    | 31.9973 | 34.8162  | 39.0000   | 1984.01.15 | 2001.05.15 | GNIP              |
| BEYROUTH     | 33.8719 | 35.5097  | 19.0000   | 2003.11.15 | 2006.03.15 | GNIP              |
| Biandianzhan | 37.3300 | 101.5100 |           | 2021.11.27 | 2021.11.27 | Measured data     |
| BLOUDAN      | 33.7250 | 36.1303  | 1540.0000 | 1989.12.15 | 1993.04.15 | GNIP              |
| BOGDARIN     | 54.6200 | 113.1300 | 995.0000  | 1996.01.31 | 2000.12.31 | WaterIsotopes.org |
| BOLOGNA      | 44.4833 | 11.3333  | 54.0000   | 1996.03.15 | 2001.08.31 | WaterIsotopes.org |
| BONGA        | 13.0300 | 123.9200 | 600.0000  | 1997.01.15 | 1998.12.15 | GNIP              |
| BOSSEA       | 44.2333 | 7.8500   | 820.0000  | 2000.11.15 | 2001.03.15 | GNIP              |
| BRAAKMAN     | 51.3000 | 3.7500   | 2.0000    | 1988.07.15 | 1992.04.15 | GNIP              |
| BRASIMONE    | 44.0900 | 11.0800  | 842.0000  | 1971.09.15 | 1986.04.15 | GNIP              |
| Brasimone    | 44.1165 | 11.1157  |           | 1971.09.01 | 1986.04.01 | References        |
| BRATISLAVA   | 48.1691 | 17.1119  | 286.0000  | 1992.01.15 | 1992.02.15 | GNIP              |
| BRAUNSCHWEIG | 52.2914 | 10.4464  | 81.0000   | 1990.01.15 | 2012.12.15 | GNIP              |
| BRAVICEA     | 47.4000 | 28.4917  | 78.0000   | 2007.09.15 | 2015.07.15 | GNIP              |

|                                  |         |          |           |            |            |                       |
|----------------------------------|---------|----------|-----------|------------|------------|-----------------------|
| BREST                            | 52.0944 | 23.7058  | 136.0000  | 1981.01.15 | 1983.12.15 | GNIP                  |
| BREST<br>PLOUZANE                | 48.3600 | -4.5700  | 80.0000   | 1996.04.15 | 2002.12.15 | GNIP                  |
| BUCHS SUHR                       | 47.3723 | 8.0831   | 397.0000  | 1994.07.15 | 2019.12.15 | GNIP                  |
| BUSAN                            | 35.2306 | 129.0803 | 96.8000   | 2019.02.15 | 2020.06.15 | GNIP                  |
| CACERES                          | 39.4667 | -6.3333  | 405.0000  | 2000.03.15 | 2015.12.15 | GNIP                  |
| CAGBULACAO                       | 11.1200 | 124.6200 | 200.0000  | 1997.02.15 | 1998.12.15 | GNIP                  |
| CAGLIARI                         | 39.2167 | 9.1167   | 25.0000   | 1998.08.31 | 1998.08.31 | WaterIsotop<br>es.org |
| CAHUL                            | 45.8000 | 28.2000  | 113.0000  | 2007.09.15 | 2015.08.15 | GNIP                  |
| CAIRO                            | 30.0800 | 31.2800  | 34.0000   | 1987.03.15 | 2003.03.15 | GNIP                  |
| CAMERON<br>HIGHLANDS             | 4.4667  | 101.3833 | 1430.0000 | 1996.02.15 | 2016.12.15 | GNIP                  |
| CAMPISTROUS                      | 43.1200 | 0.3800   | 600.0000  | 1997.10.15 | 1998.12.15 | GNIP                  |
| CAMPO CARLO<br>MAGNO             | 46.2333 | 10.8167  | 1685.0000 | 1999.09.30 | 1999.09.30 | WaterIsotop<br>es.org |
| CANINO                           | 42.4667 | 11.7500  | 229.0000  | 1999.08.31 | 1999.08.31 | WaterIsotop<br>es.org |
| CARPENTRAS                       | 44.9500 | 5.7800   | 99.0000   | 1997.02.15 | 1998.12.15 | GNIP                  |
| CASALE<br>MONFERRATO             | 45.1400 | 8.4500   | 116.0000  | 2002.02.28 | 2002.02.28 | WaterIsotop<br>es.org |
| CBS                              | 48.0700 | 114.5200 | 759.0000  | 2002.10.01 | 2003.09.01 | WaterIsotop<br>es.org |
| CEGLIE<br>MESSAPICO              | 40.6500 | 17.5167  | 302.0000  | 1999.10.31 | 1999.10.31 | WaterIsotop<br>es.org |
| Centre for Earth<br>Science, IIS | 13.0181 | 77.5693  |           | 2010.06.07 | 2010.09.16 | WaterIsotop<br>es.org |
| CESTAS-PIERROT<br>ON             | 44.7381 | -0.7747  | 59.0000   | 2007.02.15 | 2018.12.15 | GNIP                  |
| CHANGCHUN                        | 43.9000 | 125.2167 | 237.0000  | 1999.05.15 | 2001.11.15 | GNIP                  |
| CHANGSHA                         | 28.2000 | 113.0667 | 37.0000   | 1988.01.15 | 1992.12.15 | GNIP                  |
| CHARCHES                         | 37.2932 | -2.9559  | 1426.0000 | 2013.01.15 | 2015.11.15 | GNIP                  |
| Chat-11                          | 44.8000 | 34.2900  |           | 2011.01.01 | 2011.12.01 | References            |
| CHENGDU                          | 30.6700 | 104.0200 | 506.0000  | 1986.07.15 | 1998.05.15 | GNIP                  |
| CHEONGJU                         | 36.6200 | 127.4600 | 62.0000   | 1999.01.15 | 2016.12.15 | GNIP                  |
| CHERSKIY                         | 68.7594 | 161.3425 | 30.0000   | 2005.08.15 | 2010.06.15 | GNIP                  |
| Chiba                            | 35.3700 | 140.6000 | 20.0000   | 2013.02.01 | 2013.12.31 | WaterIsotop<br>es.org |
| Chibi                            | 29.7200 | 113.8800 |           | 2021.04.22 | 2022.02.22 | Measured<br>data      |
| Chichibu                         | 35.5600 | 138.5100 | 800.0000  | 2013.01.31 | 2014.01.06 | WaterIsotop<br>es.org |
| CHISINAU                         | 46.9667 | 28.9000  | 125.0000  | 2007.08.15 | 2015.07.15 | GNIP                  |

|                             |         |          |           |            |            |                   |
|-----------------------------|---------|----------|-----------|------------|------------|-------------------|
| CHONGQING<br>(CUNTAN JIANG) | 29.6200 | 106.6000 | 192.0000  | 1992.06.15 | 1992.10.15 | GNIP              |
| CHOPOK                      | 48.9330 | 19.5830  | 2008.0000 | 1991.08.15 | 1992.02.15 | GNIP              |
| ChP-12                      | 44.7556 | 34.3411  |           | 2012.01.01 | 2015.12.08 | References        |
| CHUADANGA                   | 23.6400 | 88.8500  | 20.0000   | 2014.05.15 | 2018.12.15 | GNIP              |
| CIUDAD REAL                 | 38.9892 | -3.9203  | 628.0000  | 2000.01.15 | 2015.12.15 | GNIP              |
| CKM                         | 36.5355 | 138.0619 | 763.0000  | 2011.08.15 | 2013.10.15 | WaterIsotopes.org |
| CLUJ                        | 46.7800 | 23.6100  | 330.0000  | 2015.01.15 | 2016.12.15 | GNIP              |
| COMACCHIO                   | 44.6975 | 12.1858  | 1.0000    | 2001.05.31 | 2001.05.31 | WaterIsotopes.org |
| Cona Lake West              | 32.0568 | 91.4201  | 4623.0000 | 2011.05.12 | 2013.10.21 | WaterIsotopes.org |
| Corchia                     | 44.0206 | 10.2842  |           | 2009.10.01 | 2015.10.01 | References        |
| COSENZA                     | 39.3000 | 16.2500  | 238.0000  | 2001.07.31 | 2001.07.31 | WaterIsotopes.org |
| Coxs Bazar                  | 21.4420 | 91.9690  |           | 2015.03.05 | 2015.12.18 | WaterIsotopes.org |
| COX'S BAZAR                 | 21.4400 | 91.9900  | 5.0000    | 2014.05.15 | 2018.10.15 | GNIP              |
| CUXHAVEN                    | 53.8713 | 8.7058   | 5.0000    | 1990.01.15 | 2012.12.15 | GNIP              |
| DALBAHCE                    | 39.6667 | 43.8583  | 1740.0000 | 1990.04.15 | 1991.11.15 | GNIP              |
| DAMASCUS                    | 33.4200 | 36.5200  | 609.0000  | 1989.12.15 | 1993.04.15 | GNIP              |
| DARFO-BOARIO                | 45.8833 | 10.1833  | 208.0000  | 1999.01.31 | 1999.01.31 | WaterIsotopes.org |
| Datanxiang                  | 38.4600 | 103.1400 |           | 2020.07.24 | 2021.09.05 | Measured data     |
| DAX                         | 43.6833 | -1.0667  | 9.0000    | 1999.01.15 | 2005.01.15 | GNIP              |
| DE BILT                     | 52.1000 | 5.1800   | 2.0000    | 1981.01.15 | 1991.10.15 | GNIP              |
| DE KOOY                     | 52.9300 | 4.7800   | 1.0000    | 1981.01.15 | 1987.12.15 | GNIP              |
| DEVPRAYAG                   | 30.1406 | 78.5967  | 465.0000  | 2004.06.15 | 2006.10.15 | GNIP              |
| DHAKA                       | 23.9528 | 90.2792  | 14.0000   | 2009.03.15 | 2018.12.15 | GNIP              |
| Dilijan                     | 40.7419 | 44.8636  | 2104.2000 | 2014.07.01 | 2015.04.21 | WaterIsotopes.org |
| DILIMAN<br>QUEZON CITY      | 14.6400 | 121.0400 | 42.0000   | 2000.01.15 | 2016.12.15 | GNIP              |
| DINAJPUR                    | 25.6200 | 88.6600  | 35.0000   | 2014.02.15 | 2018.12.15 | GNIP              |
| DIYARBAKIR                  | 37.9011 | 40.2036  | 686.0000  | 2008.09.15 | 2016.12.15 | GNIP              |
| DOBRANI                     | 30.9461 | 78.6881  | 2050.0000 | 2004.08.15 | 2006.09.15 | GNIP              |
| DONG HOI                    | 17.4600 | 106.6200 | 1.0000    | 2014.01.15 | 2018.12.15 | GNIP              |
| DRAIX                       | 44.1333 | 6.3333   | 851.0000  | 2004.02.15 | 2018.12.15 | GNIP              |
| DRESDEN                     | 51.0500 | 13.7300  | 113.0000  | 1997.06.15 | 2001.01.15 | GNIP              |
| DUBROVNIK                   | 42.6600 | 18.0833  | 52.0000   | 2000.09.15 | 2003.12.15 | GNIP              |
| DUDINKA                     | 69.4075 | 86.1806  | 66.0000   | 1990.02.15 | 1990.12.15 | GNIP              |



|                          |         |          |           |            |            |                       |
|--------------------------|---------|----------|-----------|------------|------------|-----------------------|
| DUGOPOLJE                | 43.5833 | 16.6000  | 295.0000  | 2008.03.15 | 2009.01.15 | GNIP                  |
| Dunhuang                 | 40.1141 | 94.6028  |           | 2021.05.13 | 2021.06.15 | Measured data         |
| DURRAH                   | 29.3554 | 34.9603  | 0.0000    | 1968.11.15 | 1969.04.15 | GNIP                  |
| EDIRNE                   | 41.6781 | 26.5592  | 48.0000   | 2008.07.15 | 2016.12.15 | GNIP                  |
| EL-ARISH                 | 31.0800 | 33.8300  | 31.0000   | 2001.01.15 | 2003.03.15 | GNIP                  |
| EMMERICH                 | 51.8300 | 6.2500   | 43.0000   | 1990.01.15 | 2012.11.15 | GNIP                  |
| ENISEJSK                 | 58.4500 | 92.1500  | 78.0000   | 1990.01.15 | 1990.12.15 | GNIP                  |
| ERLANGEN<br>(GEOZENTRUM) | 49.5971 | 11.0055  | 270.0000  | 2010.07.15 | 2018.12.15 | GNIP                  |
| ERZURUM                  | 39.9106 | 41.2756  | 1758.0000 | 2008.07.15 | 2016.12.15 | GNIP                  |
| ESPOO                    | 60.1801 | 24.8329  | 30.0000   | 2000.11.15 | 2017.12.15 | GNIP                  |
| Evaristo_SG              | 1.2953  | 103.7711 |           | 2014.11.11 | 2015.11.26 | WaterIsotop<br>es.org |
| FANANO 1                 | 44.2000 | 10.7833  | 1280.0000 | 1999.02.28 | 1999.02.28 | WaterIsotop<br>es.org |
| FANANO 2                 | 44.2000 | 10.7834  | 935.0000  | 1999.02.28 | 1999.02.28 | WaterIsotop<br>es.org |
| FANANO 3                 | 44.2000 | 10.7835  | 660.0000  | 1999.02.28 | 1999.02.28 | WaterIsotop<br>es.org |
| FANO                     | 43.8333 | 13.0167  | 12.0000   | 1999.12.31 | 1999.12.31 | WaterIsotop<br>es.org |
| Fantan                   | 40.3956 | 44.6681  | 1779.0000 | 2014.07.01 | 2015.02.02 | WaterIsotop<br>es.org |
| FEHMARN                  | 54.5283 | 11.0603  | 3.0000    | 1997.06.15 | 2013.12.15 | GNIP                  |
| Fengjie                  | 31.0183 | 109.4648 |           | 2022.01.25 | 2022.02.08 | Measured data         |
| FIRENZE                  | 43.7667 | 11.2500  | 50.0000   | 2001.06.30 | 2001.06.30 | WaterIsotop<br>es.org |
| FLEAM DYKE               | 52.1667 | 0.2500   | 30.0000   | 1980.01.15 | 1983.12.15 | GNIP                  |
| FONTAINEBLEAU            | 48.4042 | 2.6965   | 79.0000   | 2016.04.15 | 2018.09.15 | GNIP                  |
| Fukui                    | 36.3000 | 136.1300 | 10.0000   | 2013.02.01 | 2014.01.04 | WaterIsotop<br>es.org |
| Funabashi                | 35.4300 | 140.1000 | 30.0000   | 2013.02.01 | 2013.12.27 | WaterIsotop<br>es.org |
| FUNCHAL                  | 32.6333 | -16.9000 | 58.0000   | 1990.01.15 | 2017.02.15 | GNIP                  |
| Furano                   | 43.1300 | 142.3500 | 400.0000  | 2013.01.29 | 2013.12.31 | WaterIsotop<br>es.org |
| FUZHOU                   | 26.0833 | 119.2833 | 16.0000   | 1985.10.15 | 1992.12.15 | GNIP                  |
| Fuzhou                   | 26.0277 | 119.2103 |           | 2021.12.17 | 2022.04.20 | Measured data         |
| GALLO                    | 41.3000 | 13.9833  | 825.0000  | 1998.09.30 | 1998.09.30 | WaterIsotop<br>es.org |

|                         |         |          |           |            |            |                   |
|-------------------------|---------|----------|-----------|------------|------------|-------------------|
| GANGOTRI                | 30.9967 | 78.9403  | 3053.0000 | 2004.06.15 | 2006.09.15 | GNIP              |
| Ganzi                   | 31.9800 | 100.0000 |           | 2022.01.27 | 2022.05.01 | Measured data     |
| Gaotai                  | 39.3783 | 99.8192  |           | 2020.11.21 | 2022.02.18 | Measured data     |
| GARDANNE                | 43.4500 | 5.4500   | 215.0000  | 1997.04.15 | 1998.12.15 | GNIP              |
| GARMISCH-PART ENKIRCHEN | 47.4828 | 11.0622  | 719.0000  | 1990.01.15 | 2013.12.15 | GNIP              |
| GENOA                   | 44.4200 | 8.8500   | 2.0000    | 1990.01.15 | 2002.01.15 | GNIP              |
| GENOVA-SESTRI           | 44.4167 | 8.9500   | 2.0000    | 1997.12.31 | 1997.12.31 | WaterIsotopes.org |
| GILZE-RIJEN             | 51.5700 | 4.9300   | 11.0000   | 1981.01.15 | 1988.03.15 | GNIP              |
| GIRONA                  | 41.9117 | 2.7633   | 129.0000  | 2000.03.15 | 2015.12.15 | GNIP              |
| GOERLITZ                | 51.1622 | 14.9506  | 238.0000  | 1997.06.15 | 2013.12.15 | GNIP              |
| Gokase                  | 32.4100 | 131.1100 | 550.0000  | 2013.02.01 | 2013.12.20 | WaterIsotopes.org |
| GOMUKH                  | 30.9261 | 78.9403  | 3800.0000 | 2004.05.15 | 2006.09.15 | GNIP              |
| GOR'KIJ                 | 56.2167 | 43.8167  | 82.0000   | 1981.01.15 | 1983.12.15 | GNIP              |
| GOSPIC                  | 44.5333 | 15.3833  | 564.0000  | 2008.02.15 | 2008.12.15 | GNIP              |
| GRANIGA                 | 46.0700 | 8.1100   | 1100.0000 | 2000.12.31 | 2000.12.31 | WaterIsotopes.org |
| GRAZ                    | 47.0778 | 15.4489  | 366.0000  | 1990.01.15 | 2002.12.15 | GNIP              |
| GREIFSWALD              | 54.0967 | 13.4056  | 2.0000    | 2002.07.15 | 2013.12.15 | GNIP              |
| GRIMSEL                 | 46.5725 | 8.3327   | 1950.0000 | 1971.01.15 | 2019.12.15 | GNIP              |
| GRONINGEN               | 53.2300 | 6.5500   | 1.0000    | 1990.01.15 | 2012.12.15 | GNIP              |
| Guangyuan               | 32.4337 | 105.8300 |           | 2021.12.10 | 2022.05.09 | Measured data     |
| GUANGZHOU               | 23.1300 | 113.3200 | 7.0000    | 2007.01.11 | 2009.11.14 | WaterIsotopes.org |
| Guangzhou               | 23.1600 | 113.2300 |           | 2021.12.19 | 2022.02.22 | Measured data     |
| GUILIN                  | 25.0700 | 110.0800 | 170.0000  | 1983.01.15 | 1990.12.15 | GNIP              |
| GUIYANG                 | 26.5833 | 106.7167 | 1071.0000 | 1988.02.15 | 1992.12.15 | GNIP              |
| Guizhou                 | 26.8000 | 106.7800 |           | 2022.01.04 | 2022.05.11 | Measured data     |
| GUTTANNEN               | 46.6577 | 8.2927   | 1055.0000 | 2002.01.15 | 2019.12.15 | GNIP              |
| GUWAHATI                | 26.1908 | 91.7953  | 54.0000   | 2003.07.15 | 2004.10.15 | GNIP              |
| Guyuan                  | 36.0100 | 106.2800 |           | 2020.11.20 | 2022.02.16 | Measured data     |
| H-4 RWASHED             | 32.5025 | 38.1945  | 686.0000  | 1968.11.15 | 1969.04.15 | GNIP              |
| H-5 SAFAWI              | 32.1991 | 37.1026  | 715.0000  | 1968.12.15 | 1969.04.15 | GNIP              |
| HABAROVSK               | 48.5200 | 135.1700 | 72.0000   | 1971.01.15 | 1971.12.15 | GNIP              |
| HAERBIN                 | 45.6800 | 126.6200 | 172.0000  | 1986.06.15 | 1997.08.15 | GNIP              |

|                    |         |          |           |            |            |                   |
|--------------------|---------|----------|-----------|------------|------------|-------------------|
| Hagi               | 34.2400 | 131.2300 | 5.0000    | 2013.02.01 | 2014.01.04 | WaterIsotopes.org |
| HAIKOU             | 20.0333 | 110.3500 | 15.0000   | 1988.03.15 | 2000.07.15 | GNIP              |
| HAMBANTOTA         | 6.1167  | 81.1333  | 20.0000   | 1983.01.15 | 1986.06.15 | GNIP              |
| HANOI              | 21.0453 | 105.7987 | 11.0000   | 2004.09.15 | 2007.12.15 | GNIP              |
| HANOI (IGS)        | 21.0300 | 105.8400 | 15.0000   | 2015.01.15 | 2018.12.15 | GNIP              |
| Hebei Township     | 34.7000 | 100.7857 |           | 2021.07.23 | 2021.09.19 | Measured data     |
| Heidelberg         | 49.8000 | 8.7000   | 110.0000  | 1981.01.31 | 1988.06.30 | WaterIsotopes.org |
| Hemuqiao watershed | 34.3100 | 119.3400 |           | 2017.10.01 | 2020.05.31 | References        |
| HETIAN             | 37.1333 | 79.9333  | 1375.0000 | 1988.02.15 | 1992.12.15 | GNIP              |
| Hezuo              | 35.0000 | 102.9100 |           | 2021.03.26 | 2021.11.11 | Measured data     |
| Higashihiroshima   | 34.2300 | 132.4200 | 220.0000  | 2013.02.01 | 2013.08.01 | WaterIsotopes.org |
| Hikone             | 35.1500 | 136.1200 | 90.0000   | 2013.02.01 | 2014.01.01 | WaterIsotopes.org |
| Ho Chi Minh City   | 10.0430 | 106.6880 |           | 2013.05.15 | 2015.12.21 | WaterIsotopes.org |
| HOF-HOHENSAAS      | 50.3119 | 11.8758  | 565.0000  | 1990.01.15 | 2013.12.15 | GNIP              |
| Hofu               | 34.2000 | 131.3400 | 5.0000    | 2013.02.01 | 2013.12.30 | WaterIsotopes.org |
| HOHENPEISSENBERG   | 47.8008 | 11.0108  | 977.0000  | 1990.01.15 | 2008.10.15 | GNIP              |
| HOMS               | 34.7500 | 36.7167  | 490.0000  | 1989.12.15 | 1993.05.15 | GNIP              |
| HONG KONG          | 22.3167 | 114.1667 | 66.0000   | 1990.01.15 | 2018.12.15 | GNIP              |
| Hongqigu           | 38.2100 | 102.5000 |           | 2019.07.09 | 2021.09.06 | Measured data     |
| HONGSEONG          | 36.5553 | 126.6359 | 62.0000   | 2018.03.15 | 2020.08.15 | GNIP              |
| Hongya County      | 29.9066 | 103.3730 |           | 2020.07.22 | 2022.05.09 | Measured data     |
| Huangshuigou       | 37.6900 | 101.9100 |           | 2021.11.27 | 2021.11.27 | Measured data     |
| Huanjiang County   | 24.4300 | 108.1800 |           | 2011.06.01 | 2020.11.01 | References        |
| Hulinzhan          | 37.4100 | 101.5300 |           | 2019.08.19 | 2021.11.27 | Measured data     |
| HYDERABAD          | 17.4500 | 78.4700  | 545.0000  | 1997.09.15 | 2001.04.15 | GNIP              |
| Hynek_04-AB        | 40.7544 | 75.1867  | 3508.0000 | 2004.07.15 | 2004.07.17 | WaterIsotopes.org |
| Hynek_04-CTS       | 41.7742 | 78.3999  | 4457.0000 | 2004.07.29 | 2004.07.31 | WaterIsotopes.org |
| Hynek_04-IK        | 42.6595 | 77.2028  | 1620.3333 | 2004.04.30 | 2004.08.17 | WaterIsotop       |

|                |         |          |           |            |            |                       |
|----------------|---------|----------|-----------|------------|------------|-----------------------|
|                |         |          |           |            |            | es.org                |
| Hynek_04-WA    | 35.8232 | 74.6504  | 1426.4640 | 2004.07.01 | 2004.07.01 | WaterIsotop<br>es.org |
| Hynek_05-AB    | 40.7441 | 75.2155  | 3760.0000 | 2005.09.06 | 2005.09.06 | WaterIsotop<br>es.org |
| Hynek_05-WA    | 36.8500 | 75.4281  | 4719.5232 | 2004.07.01 | 2004.07.01 | WaterIsotop<br>es.org |
| Hynek_06-WA    | 41.4587 | 76.4511  | 2253.0816 | 2004.07.01 | 2004.07.01 | WaterIsotop<br>es.org |
| Hynek_07-WA    | 41.4587 | 76.4511  | 2253.0816 | 2004.07.01 | 2004.07.01 | WaterIsotop<br>es.org |
| Hynek_08-WA    | 41.7568 | 75.1089  | 2567.0256 | 2004.07.01 | 2004.07.01 | WaterIsotop<br>es.org |
| Hynek_09-WA    | 41.7643 | 75.2801  | 3054.4008 | 2004.07.01 | 2004.07.01 | WaterIsotop<br>es.org |
| Hynek_10-WA    | 40.8231 | 75.2893  | 3031.0000 | 2004.07.01 | 2004.07.01 | WaterIsotop<br>es.org |
| Hynek_Bos-Prec | 42.6587 | 77.2031  | 1644.2500 | 2004.03.11 | 2004.05.30 | WaterIsotop<br>es.org |
| Hynek_IK       | 42.6606 | 77.2026  | 1635.0000 | 2003.07.05 | 2003.11.25 | WaterIsotop<br>es.org |
| Hynek_IL       | 42.6452 | 74.2751  | 1581.0000 | 2008.09.03 | 2008.09.03 | WaterIsotop<br>es.org |
| Hynek_KB       | 42.9391 | 78.3258  | 2258.0000 | 2003.06.28 | 2003.06.28 | WaterIsotop<br>es.org |
| Hynek_KYR07    | 40.8194 | 75.2281  | 3010.0000 | 2007.09.05 | 2007.09.05 | WaterIsotop<br>es.org |
| Hynek_TAJ07    | 37.6453 | 74.3535  | 4100.0000 | 2007.09.05 | 2007.09.08 | WaterIsotop<br>es.org |
| Ichinomiya     | 35.2200 | 140.2200 | 5.0000    | 2013.02.02 | 2013.10.01 | WaterIsotop<br>es.org |
| IDLEB          | 35.9392 | 36.6067  | 451.0000  | 1992.12.15 | 1993.05.15 | GNIP                  |
| IKW            | 35.2231 | 138.2231 | 755.0000  | 2011.05.15 | 2015.06.15 | WaterIsotop<br>es.org |
| Imizu          | 36.4200 | 137.5000 | 20.0000   | 2013.01.31 | 2013.12.31 | WaterIsotop<br>es.org |
| IMPERIA        | 43.8833 | 8.0500   | 10.0000   | 2001.03.31 | 2001.03.31 | WaterIsotop<br>es.org |
| INCHNADAMPH    | 58.1500 | -4.9750  | 73.0000   | 2003.12.15 | 2005.10.15 | GNIP                  |
| IRKUTSK        | 52.2700 | 104.3500 | 485.0000  | 1990.01.15 | 1990.11.15 | GNIP                  |
| Irkutsk        | 52.3000 | 104.2833 | 469.0000  | 2011.06.24 | 2017.04.04 | WaterIsotop<br>es.org |
| Isesaki        | 36.1500 | 139.1200 | 50.0000   | 2013.02.01 | 2013.12.27 | WaterIsotop           |

|                                |         |          |           |            |            |                       |
|--------------------------------|---------|----------|-----------|------------|------------|-----------------------|
|                                |         |          |           |            |            | es.org                |
| ISFJORD RADIO                  | 78.0700 | 13.6300  | 6.0000    | 1961.07.15 | 1975.05.15 | GNIP                  |
| ISO_NS_Birgit                  | 47.7347 | 12.8843  | 470.0000  | 2012.06.18 | 2012.11.14 | WaterIsotop<br>es.org |
| ISO_NS_GC                      | 47.7885 | 12.9803  | 442.0000  | 2012.05.24 | 2013.02.01 | WaterIsotop<br>es.org |
| ISO_NS_Rothmann<br>bach        | 47.7035 | 13.0363  | 465.0000  | 2012.06.23 | 2012.12.05 | WaterIsotop<br>es.org |
| ISO_NS_Salzburger<br>Hochthron | 47.7165 | 13.0053  | 1829.0000 | 2012.05.25 | 2012.10.10 | WaterIsotop<br>es.org |
| ISO_NS_Veitlbruch              | 47.7332 | 12.9738  | 639.0000  | 2012.05.24 | 2012.12.04 | WaterIsotop<br>es.org |
| ISO_NS_Zeppezaue<br>r Haus     | 47.7245 | 13.0059  | 1649.0000 | 2012.05.25 | 2012.10.10 | WaterIsotop<br>es.org |
| IZMIR                          | 38.4306 | 27.1511  | 120.0000  | 2008.09.15 | 2016.12.15 | GNIP                  |
| IZRAA                          | 32.8389 | 36.2569  | 580.0000  | 1989.12.15 | 1993.04.15 | GNIP                  |
| Izumi                          | 32.5000 | 130.2100 | 15.0000   | 2013.02.01 | 2013.12.21 | WaterIsotop<br>es.org |
| JAFFNA                         | 9.6678  | 80.0065  | 6.0000    | 2014.01.15 | 2018.12.15 | GNIP                  |
| JAKARTA                        | -6.1800 | 106.8300 | 8.0000    | 1980.05.15 | 1997.12.15 | GNIP                  |
| JAMMU                          | 32.6925 | 74.8461  | 367.0000  | 2003.07.15 | 2006.09.15 | GNIP                  |
| JARABLOUS                      | 36.8222 | 38.0125  | 351.0000  | 1991.12.15 | 1993.05.15 | GNIP                  |
| JAYAPURA                       | -2.5300 | 140.7200 | 3.0000    | 1980.01.15 | 1991.06.15 | GNIP                  |
| Jingtai                        | 37.1836 | 104.0630 |           | 2020.08.04 | 2021.08.05 | Measured<br>data      |
| Jinta County                   | 39.9843 | 98.9032  |           | 2021.05.14 | 2022.02.17 | Measured<br>data      |
| Jiudun                         | 38.0700 | 102.4500 |           | 2019.07.13 | 2021.10.08 | Measured<br>data      |
| Jiuzhaigou                     | 33.2632 | 104.2367 |           | 2020.07.23 | 2021.10.18 | Measured<br>data      |
| JOHOR BAHRU                    | 1.6000  | 103.6667 | 35.0000   | 2002.03.15 | 2016.12.15 | GNIP                  |
| KABUL                          | 34.5700 | 69.2133  | 1860.0000 | 1970.01.15 | 1989.09.15 | GNIP                  |
| Kagoshima                      | 31.3700 | 130.3100 | 15.0000   | 2013.03.31 | 2013.07.31 | WaterIsotop<br>es.org |
| Kakamigahara                   | 35.2400 | 136.5200 | 40.0000   | 2013.02.01 | 2014.01.01 | WaterIsotop<br>es.org |
| KAKINADA                       | 17.0211 | 82.2567  | 8.0000    | 2003.07.15 | 2006.09.15 | GNIP                  |
| KALININ                        | 56.9000 | 35.9000  | 31.0000   | 1981.01.15 | 1987.07.15 | GNIP                  |
| KANDALAKSA                     | 67.1500 | 32.3500  | 26.0000   | 1996.01.15 | 2000.12.15 | GNIP                  |
| Kapan                          | 39.2047 | 46.4461  | 704.0000  | 2014.07.07 | 2015.05.06 | WaterIsotop<br>es.org |
| KARACHI                        | 24.9000 | 67.1300  | 23.0000   | 1961.07.15 | 1973.12.15 | GNIP                  |

|                         |         |          |           |            |            |                   |
|-------------------------|---------|----------|-----------|------------|------------|-------------------|
| KARLSRUHE               | 49.0392 | 8.3650   | 112.0000  | 1990.01.15 | 2013.12.15 | GNIP              |
| Kashgar                 | 39.4704 | 75.9898  |           | 2020.08.29 | 2021.06.16 | Measured data     |
| KBU                     | 47.2800 | 108.7800 | 1255.0000 | 2002.10.01 | 2003.09.01 | WaterIsotopes.org |
| KEYWORTH                | 52.8833 | -1.0833  | 60.0000   | 1985.01.15 | 1996.12.15 | GNIP              |
| KHANTY-MANSIY<br>SK     | 60.9667 | 69.0667  | 40.0000   | 1996.01.15 | 1997.03.15 | GNIP              |
| KHARKIV                 | 49.9333 | 36.2833  | 148.0000  | 2013.11.15 | 2016.12.15 | GNIP              |
| Kinko                   | 31.1400 | 130.4700 | 20.0000   | 2013.02.01 | 2014.01.01 | WaterIsotopes.org |
| KIROV                   | 58.6500 | 49.6167  | 164.0000  | 1981.01.15 | 2000.12.15 | GNIP              |
| Kiryu                   | 36.2400 | 139.1900 | 140.0000  | 2013.02.01 | 2014.01.01 | WaterIsotopes.org |
| KKC                     | 36.2533 | 137.6686 | 1529.0000 | 2010.07.15 | 2015.06.15 | WaterIsotopes.org |
| KLAGENFURT<br>FLUGHAFEN | 46.6483 | 14.3183  | 450.0000  | 1990.01.15 | 2002.12.15 | GNIP              |
| KO SAMUI                | 9.4667  | 100.0500 | 7.0000    | 1980.01.15 | 1983.11.15 | GNIP              |
| KO SICHANG              | 13.1700 | 100.8000 | 26.0000   | 1984.06.15 | 1991.10.15 | GNIP              |
| Kobayashi               | 31.5900 | 130.5800 | 209.0000  | 2013.02.01 | 2013.12.22 | WaterIsotopes.org |
| Kobayashi2              | 31.5900 | 130.5800 | 668.0000  | 2013.02.01 | 2013.12.22 | WaterIsotopes.org |
| KOBLENZ                 | 50.3381 | 7.6000   | 85.0000   | 1990.01.15 | 2013.12.15 | GNIP              |
| Kochi                   | 33.3200 | 133.2900 | 30.0000   | 2013.02.01 | 2014.01.06 | WaterIsotopes.org |
| KOF                     | 35.6828 | 138.5664 | 304.0000  | 2010.07.15 | 2015.06.15 | WaterIsotopes.org |
| KOLKATA                 | 22.7978 | 88.3717  | 6.0000    | 2004.07.15 | 2006.10.15 | GNIP              |
| KOMIZA-VIS<br>ISLAND    | 43.0392 | 16.0906  | 6.0000    | 2000.09.15 | 2003.12.15 | GNIP              |
| KONSTANZ                | 47.6772 | 9.1900   | 443.0000  | 1990.01.15 | 2013.12.15 | GNIP              |
| KOTA BAHRU              | 6.1667  | 102.2833 | 7.0000    | 1991.01.15 | 2016.12.15 | GNIP              |
| KOTA KINABALU           | 5.9300  | 116.0600 | 9.0000    | 2013.04.15 | 2016.12.15 | GNIP              |
| KOZHICODE               | 11.2500 | 75.7800  | 20.0000   | 1997.05.15 | 2007.11.15 | GNIP              |
| KOZINA                  | 45.6000 | 13.9333  | 497.0000  | 2000.10.15 | 2003.12.15 | GNIP              |
| K-pusztá                | 46.9600 | 19.5500  |           | 2013.04.02 | 2017.12.15 | References        |
| KRAKOW                  | 50.0617 | 19.8486  | 205.0000  | 1990.01.15 | 2016.12.15 | GNIP              |
| KRENKEL POLAR<br>GMO    | 80.6167 | 58.0500  | 20.0000   | 1990.02.15 | 1990.12.15 | GNIP              |
| KUALA LUMPUR            | 2.8833  | 101.7833 | 26.0000   | 2000.01.15 | 2016.12.15 | GNIP              |
| KUALA                   | 5.3833  | 103.1000 | 10.0000   | 2001.05.15 | 2016.12.15 | GNIP              |

|                        |         |          |           |            |            |                   |
|------------------------|---------|----------|-----------|------------|------------|-------------------|
| TERENGGANU             |         |          |           |            |            |                   |
| Kuala Terengganu       | 5.4120  | 103.0850 |           | 2014.12.04 | 2016.09.12 | WaterIsotopes.org |
| KUANTAN                | 3.7833  | 103.3333 | 1.0000    | 2013.04.15 | 2016.12.15 | GNIP              |
| KUCHING                | 1.5300  | 110.3400 | 15.0000   | 2013.05.15 | 2016.12.15 | GNIP              |
| Kuching                | 1.4590  | 119.4130 |           | 2014.07.30 | 2016.02.29 | WaterIsotopes.org |
| Kuju                   | 33.1000 | 131.1700 | 550.0000  | 2013.02.01 | 2014.01.01 | WaterIsotopes.org |
| KUMAMOTO               | 32.8133 | 130.7292 | 26.0000   | 2015.04.15 | 2015.12.15 | GNIP              |
| Kumamoto               | 32.4800 | 130.4300 | 30.0000   | 2013.01.31 | 2013.12.28 | WaterIsotopes.org |
| KUNGUR                 | 57.4368 | 56.9593  | 120.0000  | 2016.12.15 | 2018.06.15 | GNIP              |
| KUNMING                | 25.0167 | 102.6833 | 1892.0000 | 1988.02.15 | 2003.12.15 | GNIP              |
| KUOPIO                 | 62.8918 | 27.6254  | 116.0000  | 2005.01.15 | 2017.12.15 | GNIP              |
| KURSK                  | 51.7700 | 36.1700  | 247.0000  | 1996.01.15 | 2000.12.31 | WaterIsotopes.org |
| Kushimoto              | 33.2600 | 135.4500 | 50.0000   | 2013.01.31 | 2014.01.03 | WaterIsotopes.org |
| Kyoto                  | 35.4000 | 135.4500 | 140.0000  | 2013.02.01 | 2014.01.06 | WaterIsotopes.org |
| Kyuji County           | 33.4299 | 101.4830 |           | 2021.03.26 | 2021.10.20 | Measured data     |
| LA BREVINE             | 46.9814 | 6.6080   | 1042.0000 | 1994.01.15 | 2019.12.15 | GNIP              |
| Lake Massaciuccoli     | 43.8376 | 10.3524  |           | 2007.03.01 | 2014.03.01 | References        |
| lake Shortandy         | 52.9889 | 70.2185  | 390.0000  | 2015.12.22 | 2016.11.02 | WaterIsotopes.org |
| LANZHOU                | 36.0500 | 103.8800 | 1517.0000 | 1985.07.15 | 1999.07.01 | GNIP              |
| L'AQUILA               | 42.3667 | 13.3667  | 710.0000  | 2001.04.30 | 2001.04.30 | WaterIsotopes.org |
| LEIPZIG                | 51.3500 | 12.4300  | 125.0000  | 1990.01.15 | 2013.12.15 | GNIP              |
| LEON VIRGEN DEL CAMINO | 42.5883 | -5.6511  | 916.0000  | 2000.02.15 | 2015.12.15 | GNIP              |
| LEOVA                  | 46.4972 | 28.3000  | 156.0000  | 2007.09.15 | 2015.08.15 | GNIP              |
| Leshan                 | 29.5820 | 103.7610 |           | 2021.12.10 | 2022.05.26 | Measured data     |
| LHASA                  | 29.7000 | 91.1333  | 3649.0000 | 1987.01.15 | 1992.12.15 | GNIP              |
| LICKO LESCE            | 44.7833 | 15.3167  | 463.0000  | 2008.02.15 | 2008.12.15 | GNIP              |
| LIEGE                  | 50.7000 | 5.4700   | 190.0000  | 1966.01.15 | 1970.11.15 | GNIP              |
| LIESEK                 | 49.3600 | 19.6800  | 692.0000  | 1991.08.15 | 1992.02.15 | GNIP              |
| Lijiaxia               | 39.9042 | 116.4000 |           | 2020.06.21 | 2020.09.08 | Measured data     |
| LIPTOVSKY              | 49.0975 | 19.5900  | 570.0000  | 1992.01.15 | 2016.12.15 | GNIP              |

|                               |         |          |          |            |            |                       |
|-------------------------------|---------|----------|----------|------------|------------|-----------------------|
| MIKULAS-ONDRA<br>SOVA         |         |          |          |            |            |                       |
| LISBON-ITN                    | 38.7927 | -9.1057  | 12.0000  | 2003.01.15 | 2017.05.15 | GNIP                  |
| LISTA                         | 58.1000 | 6.5700   | 13.0000  | 1961.02.15 | 1977.08.15 | GNIP                  |
| Liujiaxia                     | 33.1900 | 106.5700 |          | 2020.06.21 | 2021.10.19 | Measured<br>data      |
| LIUZHOU                       | 24.3500 | 109.4000 | 97.0000  | 1988.01.15 | 1992.08.15 | GNIP                  |
| Lixian                        | 34.2200 | 105.1500 |          | 2020.12.13 | 2021.11.29 | Measured<br>data      |
| LJUBLJANA                     | 46.0950 | 14.5970  | 282.0000 | 1990.01.15 | 2010.12.15 | GNIP                  |
| LOCARNO                       | 46.1738 | 8.7886   | 379.0000 | 1990.10.15 | 2019.12.15 | GNIP                  |
| Loch a Chem Alltain           | 58.6569 | -4.9362  | 90.0000  | 2015.03.31 | 2015.03.31 | WaterIsotop<br>es.org |
| Loch Bad an<br>Losguinn       | 57.0882 | -5.0415  | 240.0000 | 2015.03.31 | 2015.03.31 | WaterIsotop<br>es.org |
| Loch Bealach<br>Cornaidh      | 58.2061 | -5.0515  | 428.0000 | 2015.03.31 | 2015.03.31 | WaterIsotop<br>es.org |
| Loch Clair                    | 57.5623 | -5.3469  | 93.0000  | 2015.03.31 | 2015.03.31 | WaterIsotop<br>es.org |
| Loch Coire<br>Fionnaraich     | 57.4917 | -5.4306  | 238.0000 | 2015.03.31 | 2015.03.31 | WaterIsotop<br>es.org |
| Loch Doilean                  | 56.7501 | -5.5868  | 10.0000  | 2015.03.31 | 2015.03.31 | WaterIsotop<br>es.org |
| Loch Dubh<br>Cadhafuaraich    | 58.1339 | -4.2400  | 400.0000 | 2015.03.31 | 2015.03.31 | WaterIsotop<br>es.org |
| Loch Dubh Camas<br>an Lochain | 57.9132 | -5.5957  | 24.0000  | 2015.03.31 | 2015.03.31 | WaterIsotop<br>es.org |
| Loch Laidon                   | 56.6515 | -4.6440  | 282.0000 | 2015.03.31 | 2015.03.31 | WaterIsotop<br>es.org |
| Loch na Achlaise              | 56.5934 | -4.7540  | 294.0000 | 2015.03.31 | 2015.03.31 | WaterIsotop<br>es.org |
| Loch na Creige<br>Duibhe      | 58.0503 | -5.3823  | 100.0000 | 2015.03.31 | 2015.03.31 | WaterIsotop<br>es.org |
| Loch Nan Eion                 | 57.4997 | -5.4647  | 352.0000 | 2015.03.31 | 2015.03.31 | WaterIsotop<br>es.org |
| Loch nan Eun                  | 58.2214 | -5.0119  | 164.0000 | 2015.03.31 | 2015.03.31 | WaterIsotop<br>es.org |
| Loch Tinker                   | 56.2283 | -4.5099  | 420.0000 | 2015.03.31 | 2015.03.31 | WaterIsotop<br>es.org |
| Loch Toll an<br>Lochain       | 57.7969 | -5.2424  | 517.0000 | 2015.03.31 | 2015.03.31 | WaterIsotop<br>es.org |
| Lochan an Dubha               | 58.0000 | -5.1375  | 84.0000  | 2015.03.31 | 2015.03.31 | WaterIsotop<br>es.org |



|                      |         |          |           |            |            |                   |
|----------------------|---------|----------|-----------|------------|------------|-------------------|
| Lochan Dubh          | 56.7828 | -5.4475  | 232.0000  | 2015.03.31 | 2015.03.31 | WaterIsotopes.org |
| Lochan Feoir         | 58.1800 | -5.0135  | 117.0000  | 2015.03.31 | 2015.03.31 | WaterIsotopes.org |
| Lochan Fhionnlaidh   | 58.0448 | -5.0665  | 230.0000  | 2015.03.31 | 2015.03.31 | WaterIsotopes.org |
| Lochan Lairig Cheile | 56.4203 | -4.3393  | 290.0000  | 2015.03.31 | 2015.03.31 | WaterIsotopes.org |
| Lochnagar            | 56.9584 | -3.2333  | 785.0000  | 2015.03.31 | 2015.03.31 | WaterIsotopes.org |
| Longyangxia          | 35.9870 | 100.7096 |           | 2021.03.08 | 2021.10.26 | Measured data     |
| LUANG-PRABANG        | 19.8800 | 102.1300 | 305.0000  | 1961.03.15 | 1964.11.15 | GNIP              |
| LUCERA               | 41.5000 | 15.3333  | 219.0000  | 1998.11.30 | 1998.11.30 | WaterIsotopes.org |
| L'VOV                | 49.8167 | 23.9500  | 329.0000  | 1981.01.15 | 1983.12.15 | GNIP              |
| Mado                 | 34.9200 | 98.2091  |           | 2021.03.31 | 2021.11.01 | Measured data     |
| MADRID-RETIRO        | 40.4120 | -3.6781  | 667.0000  | 1990.01.15 | 2015.12.15 | GNIP              |
| MALAUSSENE           | 43.9200 | 7.1300   | 359.0000  | 1997.06.15 | 1998.09.15 | GNIP              |
| MALINSKA-KRK ISLAND  | 45.1208 | 14.5261  | 1.0000    | 2000.12.15 | 2001.11.15 | GNIP              |
| Mamurogawa           | 38.5600 | 140.1500 | 180.0000  | 2013.01.30 | 2014.01.08 | WaterIsotopes.org |
| Manshuitan           | 37.4900 | 104.0100 |           | 2020.08.04 | 2020.09.21 | Measured data     |
| MANTOVA              | 45.1500 | 10.8000  | 19.0000   | 2001.01.31 | 2001.01.31 | WaterIsotopes.org |
| Maqin                | 34.4775 | 100.2390 |           | 2021.03.03 | 2021.10.28 | Measured data     |
| Maqu                 | 33.9987 | 102.0727 |           | 2021.04.06 | 2021.09.04 | Measured data     |
| MARINA DI RAGUSA     | 36.8330 | 14.5500  | 5.0000    | 2001.01.31 | 2001.01.31 | WaterIsotopes.org |
| Matsue               | 35.2900 | 133.5000 | 10.0000   | 2013.02.01 | 2014.01.02 | WaterIsotopes.org |
| MDG                  | 45.7500 | 106.2700 | 1393.0000 | 2002.10.01 | 2003.08.01 | WaterIsotopes.org |
| Meguro               | 35.3900 | 139.4000 | 40.0000   | 2013.02.01 | 2014.01.01 | WaterIsotopes.org |
| Meikuang             | 37.3300 | 101.5100 |           | 2019.05.04 | 2021.11.27 | Measured data     |

|                                                      |         |          |           |            |            |                       |
|------------------------------------------------------|---------|----------|-----------|------------|------------|-----------------------|
| MEIRINGEN                                            | 46.7274 | 8.1868   | 632.0000  | 1990.01.15 | 2019.12.15 | GNIP                  |
| MILANO                                               | 45.4667 | 9.2000   | 122.0000  | 2001.02.28 | 2001.02.28 | WaterIsotop<br>es.org |
| MILHOSTOV                                            | 48.6583 | 21.7300  | 104.0000  | 1991.08.15 | 1991.12.15 | GNIP                  |
| Minamiizu                                            | 34.3800 | 138.5100 | 30.0000   | 2013.02.04 | 2014.01.06 | WaterIsotop<br>es.org |
| MINSK                                                | 53.9300 | 27.6300  | 225.0000  | 1981.01.15 | 1983.12.15 | GNIP                  |
| Miyake                                               | 34.4000 | 139.2900 | 50.0000   | 2013.01.31 | 2013.05.28 | WaterIsotop<br>es.org |
| Miyakonojo                                           | 31.4400 | 131.3000 | 149.0000  | 2013.01.31 | 2013.12.31 | WaterIsotop<br>es.org |
| Miyazaki                                             | 31.5400 | 131.2400 | 10.0000   | 2013.02.02 | 2014.01.06 | WaterIsotop<br>es.org |
| MNG                                                  | 48.2000 | 108.5000 | 1439.0000 | 2002.10.01 | 2003.09.01 | WaterIsotop<br>es.org |
| MOCHOVCE                                             | 48.2846 | 18.4757  | 206.0000  | 1991.08.15 | 1992.02.15 | GNIP                  |
| MODENA                                               | 44.6667 | 10.9167  | 34.0000   | 2001.09.30 | 2001.09.30 | WaterIsotop<br>es.org |
| Molinos                                              | 40.7900 | -0.4500  |           | 2010.03.02 | 2012.08.29 | WaterIsotop<br>es.org |
| MONACO                                               | 43.7324 | 7.4236   | 2.0000    | 1999.07.15 | 2016.12.15 | GNIP                  |
| Monatssammelprobe<br>Station Baden<br>Stadtgartenamt | 48.0113 | 16.2348  |           | 1985.07.01 | 1986.02.01 | WaterIsotop<br>es.org |
| MONTE CONERO                                         | 43.5498 | 13.6012  | 530.0000  | 2014.01.15 | 2018.12.15 | GNIP                  |
| MONTPELLIER                                          | 43.5700 | 3.9500   | 45.0000   | 1997.04.15 | 1998.12.15 | GNIP                  |
| Morioka                                              | 39.4600 | 141.7000 | 193.0000  | 2013.01.31 | 2014.01.06 | WaterIsotop<br>es.org |
| MORON DE LA<br>FRONTERA                              | 37.1645 | -5.6114  | 87.0000   | 2000.03.15 | 2015.12.15 | GNIP                  |
| MOSCOW                                               | 55.7500 | 37.5700  | 157.0000  | 1970.01.15 | 1979.11.15 | GNIP                  |
| MTM                                                  | 36.2511 | 137.9778 | 620.0000  | 2010.07.15 | 2015.06.15 | WaterIsotop<br>es.org |
| Mulu                                                 | 4.0500  | 114.8100 |           | 2013.01.01 | 2017.05.08 | WaterIsotop<br>es.org |
| Mulu Airport                                         | 4.0500  | 114.8100 | 24.0000   | 2006.07.03 | 2012.12.04 | WaterIsotop<br>es.org |
| MURCIA                                               | 38.0019 | -1.1708  | 61.0000   | 2000.03.15 | 2015.12.15 | GNIP                  |
| MURMANSK                                             | 68.9667 | 33.0500  | 46.0000   | 1981.01.15 | 1990.03.15 | GNIP                  |
| Mutouqiao                                            | 37.4800 | 101.5900 |           | 2021.11.27 | 2021.11.27 | Measured<br>data      |
| Nagasaki                                             | 32.4700 | 129.5100 | 20.0000   | 2013.01.31 | 2014.01.06 | WaterIsotop<br>es.org |

|                                        |         |          |           |            |            |                   |
|----------------------------------------|---------|----------|-----------|------------|------------|-------------------|
| Nagoya                                 | 35.1500 | 136.9700 |           | 2013.06.12 | 2017.05.27 | WaterIsotopes.org |
| NAIMAKKA                               | 68.6833 | 21.5300  | 403.0000  | 1990.01.15 | 1995.12.15 | GNIP              |
| NANJING                                | 32.1800 | 118.1800 | 26.0000   | 1988.01.15 | 1992.12.15 | GNIP              |
| Nanyang<br>Technological<br>University | 1.3460  | 103.6790 |           | 2013.11.28 | 2016.10.03 | WaterIsotopes.org |
| Nara                                   | 34.4000 | 135.5000 | 115.0000  | 2013.02.01 | 2014.01.06 | WaterIsotopes.org |
| NBY                                    | 35.9452 | 138.4697 | 1350.0000 | 2010.07.15 | 2015.06.15 | WaterIsotopes.org |
| NEUBRANDENBURG                         | 53.5483 | 13.1931  | 81.0000   | 1997.06.15 | 2002.06.15 | GNIP              |
| NEUHERBERG                             | 48.2200 | 11.5900  | 489.0000  | 1988.01.15 | 2001.12.15 | GNIP              |
| NEW DELHI                              | 28.5800 | 77.2000  | 212.0000  | 1980.01.15 | 2007.09.15 | GNIP              |
| NGN                                    | 36.6317 | 138.1891 | 354.0000  | 2010.07.15 | 2015.06.15 | WaterIsotopes.org |
| Niederschlagsstation<br>Vordernbachalm | 47.6604 | 13.9262  | 1113.0000 | 1991.11.28 | 1992.06.16 | WaterIsotopes.org |
| NIGRO                                  | 40.9667 | 15.6833  | 385.0000  | 2002.04.15 | 2004.03.15 | GNIP              |
| Ningqian                               | 37.3700 | 101.4900 |           | 2021.11.27 | 2021.11.27 | Measured<br>data  |
| NIROB                                  | 56.7193 | 60.7333  | 150.0000  | 2016.12.15 | 2018.06.15 | GNIP              |
| NOGUERA DE<br>ALBARRACIN               | 40.4580 | -1.5987  | 1449.0000 | 2013.01.15 | 2015.12.15 | GNIP              |
| Nonoichi                               | 36.3000 | 136.3600 | 40.0000   | 2013.02.01 | 2013.12.29 | WaterIsotopes.org |
| NORDERNEY                              | 53.7122 | 7.1519   | 11.0000   | 1997.06.15 | 2009.12.15 | GNIP              |
| NOVOSIBIRSK                            | 55.0300 | 82.9000  | 162.0000  | 1990.01.15 | 1990.12.15 | GNIP              |
| NRK                                    | 36.1226 | 137.6298 | 1446.0000 | 2010.07.15 | 2015.06.15 | WaterIsotopes.org |
| NSK                                    | 35.8264 | 137.8624 | 1247.0000 | 2010.07.15 | 2013.08.15 | WaterIsotopes.org |
| NY ALESUND                             | 78.9167 | 11.9333  | 7.0000    | 1990.01.15 | 2016.12.15 | GNIP              |
| NYON                                   | 46.3986 | 6.2338   | 436.0000  | 1992.07.15 | 2019.12.15 | GNIP              |
| ODENSE                                 | 55.4700 | 10.3300  | 17.0000   | 1963.03.15 | 1984.11.15 | GNIP              |
| ODESSA                                 | 46.4800 | 30.6300  | 64.0000   | 1981.02.15 | 1983.12.15 | GNIP              |
| Okayama                                | 34.4100 | 133.5500 | 7.0000    | 2013.02.02 | 2014.01.06 | WaterIsotopes.org |
| OLENEK                                 | 68.5000 | 112.4333 | 220.0000  | 1996.05.15 | 2000.08.15 | GNIP              |
| OMC                                    | 36.5053 | 137.8703 | 776.0000  | 2010.07.15 | 2015.06.15 | WaterIsotopes.org |
| OMSK                                   | 55.0100 | 73.3800  | 94.0000   | 1990.01.15 | 1990.11.15 | GNIP              |

|                               |         |          |           |            |            |                       |
|-------------------------------|---------|----------|-----------|------------|------------|-----------------------|
| ORLEANS-LA-SO<br>URCE         | 47.8332 | 1.9404   | 109.0000  | 1996.03.15 | 2014.12.15 | GNIP                  |
| PAGANELLA                     | 46.2000 | 11.0000  | 2125.0000 | 1999.09.30 | 1999.09.30 | WaterIsotop<br>es.org |
| PALLANZA                      | 45.9167 | 8.5500   | 208.0000  | 2000.12.31 | 2000.12.31 | WaterIsotop<br>es.org |
| PALMA DE<br>MALLORCA          | 39.5534 | 2.6253   | 3.0000    | 2000.02.15 | 2015.11.15 | GNIP                  |
| PALMYRA                       | 34.5500 | 38.3000  | 400.0000  | 1989.12.15 | 1993.04.15 | GNIP                  |
| Panzhuhua                     | 26.8900 | 105.0000 |           | 2021.12.26 | 2022.05.09 | Measured<br>data      |
| PARMA                         | 44.8000 | 10.3333  | 55.0000   | 2002.02.28 | 2002.02.28 | WaterIsotop<br>es.org |
| PASSO<br>PRESOLANA            | 45.5500 | 10.6000  | 1290.0000 | 1999.01.31 | 1999.01.31 | WaterIsotop<br>es.org |
| PATNA                         | 25.5736 | 85.0703  | 60.0000   | 2003.08.15 | 2005.10.15 | GNIP                  |
| PATRAS                        | 38.2800 | 21.7900  | 100.0000  | 2000.10.15 | 2019.12.15 | GNIP                  |
| PECHORA                       | 65.1167 | 57.1000  | 56.0000   | 1981.01.15 | 1983.12.15 | GNIP                  |
| PERM                          | 58.0100 | 56.1800  | 161.0000  | 1981.01.15 | 1990.07.15 | GNIP                  |
| PETROPAVLOVS<br>K KAMCAT      | 52.9700 | 158.7500 | 24.0000   | 1996.01.31 | 2000.12.31 | WaterIsotop<br>es.org |
| PETROPAVLOVS<br>K-KAMCHATSKIY | 52.9800 | 158.6500 | 24.0000   | 1996.06.15 | 1999.12.15 | GNIP                  |
| PETZENKIRCHEN                 | 48.1500 | 15.1500  | 252.0000  | 1966.03.15 | 1971.08.15 | GNIP                  |
| PIACENZA                      | 45.0167 | 9.6667   | 61.0000   | 2001.02.28 | 2001.02.28 | WaterIsotop<br>es.org |
| PIAN DELL ELMO                | 43.3431 | 13.0611  | 950.0000  | 2000.10.15 | 2002.05.15 | GNIP                  |
| Pianosa                       | 42.5859 | 10.0795  |           | 2014.11.01 | 2018.12.01 | References            |
| PINGLIANG                     | 35.5333 | 106.7000 | 1570.0000 | 2003.05.15 | 2004.04.15 | GNIP                  |
| Pingliang                     | 35.5428 | 106.6847 |           | 2021.01.24 | 2022.02.06 | Measured<br>data      |
| PIOMBINO                      | 42.9167 | 10.5333  | 21.0000   | 2000.01.31 | 2000.01.31 | WaterIsotop<br>es.org |
| Piombino                      | 42.9328 | 10.5111  |           | 1997.10.01 | 2000.01.01 | References            |
| PISA                          | 43.7167 | 10.3833  | 5.0000    | 1999.12.31 | 1999.12.31 | WaterIsotop<br>es.org |
| Pisa                          | 43.7177 | 10.4222  |           | 1992.11.01 | 2004.12.01 | References            |
| PISA (CENTRAL)                | 43.7100 | 10.4000  | 12.0000   | 1992.11.15 | 2002.02.15 | GNIP                  |
| PLITVICE                      | 44.8806 | 15.6189  | 580.0000  | 2004.01.15 | 2005.06.15 | GNIP                  |
| PODERSDORF                    | 47.8517 | 16.8431  | 121.0000  | 1965.05.15 | 1968.12.15 | GNIP                  |
| PONTA DELGADA                 | 37.7700 | -25.6500 | 175.0000  | 1990.01.15 | 2016.12.15 | GNIP                  |
| PONTREMOLI                    | 44.3667 | 9.8833   | 236.0000  | 2002.04.30 | 2002.04.30 | WaterIsotop<br>es.org |

|                          |         |          |           |            |            |                   |
|--------------------------|---------|----------|-----------|------------|------------|-------------------|
| Pontremoli               | 44.3753 | 9.8763   |           | 2000.05.01 | 2002.03.01 | References        |
| PONTRESINA               | 46.4914 | 9.8982   | 1724.0000 | 1994.07.15 | 2019.12.15 | GNIP              |
| Port Blair               | 11.6600 | 92.7300  |           | 2012.05.02 | 2016.12.11 | WaterIsotopes.org |
| PORTO                    | 41.1333 | -8.6000  | 93.0000   | 1990.01.15 | 2017.06.15 | GNIP              |
| PORTOROZ                 | 45.4667 | 13.6167  | 2.0000    | 2000.10.15 | 2006.12.15 | GNIP              |
| POTENZA-TITO<br>SCALO    | 40.6333 | 15.8000  | 632.0000  | 1999.08.31 | 1999.08.31 | WaterIsotopes.org |
| PRAGUE                   | 50.1162 | 14.3929  | 184.0000  | 2012.10.15 | 2018.12.15 | GNIP              |
| PRODROMOS                | 34.9500 | 32.8300  | 1378.0000 | 1964.03.15 | 1966.12.15 | GNIP              |
| PUERTO DE<br>NAVACERRADA | 40.7931 | -4.0106  | 1894.0000 | 2013.01.15 | 2015.12.15 | GNIP              |
| PUSCHINO                 | 54.1800 | 158.0200 | 303.0000  | 1998.04.15 | 2000.03.15 | GNIP              |
| Qinghai-Linye            | 37.3200 | 101.5200 |           | 2021.11.27 | 2021.11.27 | Measured data     |
| Qintu Lake               | 39.0300 | 103.3600 |           | 2020.07.03 | 2021.10.08 | Measured data     |
| QIQIHAR                  | 47.3833 | 123.9167 | 147.0000  | 1988.02.15 | 1992.12.15 | GNIP              |
| RAFAH                    | 31.2833 | 34.2333  | 73.0000   | 2001.01.15 | 2003.03.15 | GNIP              |
| RAMATA N1                | 57.9343 | 24.9804  | 49.0000   | 2016.02.15 | 2017.08.15 | GNIP              |
| RAMNICU<br>VALCEA        | 45.0353 | 24.2842  | 237.0000  | 2012.01.15 | 2016.11.15 | GNIP              |
| RAQQA                    | 35.8972 | 39.3417  | 246.0000  | 1991.12.15 | 1992.05.15 | GNIP              |
| REGENSBURG               | 49.0422 | 12.1019  | 365.0000  | 1990.01.15 | 2013.12.15 | GNIP              |
| REYKJAVIK                | 64.1300 | -21.9300 | 14.0000   | 1992.07.15 | 2018.12.15 | GNIP              |
| RIARDO                   | 41.2667 | 14.1500  | 110.0000  | 1998.12.31 | 1998.12.31 | WaterIsotopes.org |
| RIFUGIO<br>GRAFFER       | 46.2000 | 10.6000  | 2263.0000 | 1999.09.30 | 1999.09.30 | WaterIsotopes.org |
| RIGA                     | 56.9360 | 24.0955  | 2.9300    | 2016.04.15 | 2018.12.15 | GNIP              |
| RISHIKESH                | 30.1122 | 78.3025  | 356.0000  | 2005.07.15 | 2006.09.15 | GNIP              |
| RIVO                     | 46.5189 | 13.0122  | 615.0000  | 1998.03.31 | 1998.03.31 | WaterIsotopes.org |
| Riyadh, Compound         | 24.7956 | 46.7588  | 612.0000  | 2009.04.03 | 2012.12.18 | WaterIsotopes.org |
| Riyadh, no coords        | 24.7200 | 46.7200  | 612.0000  | 1975.01.18 | 1979.01.22 | WaterIsotopes.org |
| Riyadh, Office           | 24.6795 | 46.7318  | 612.0000  | 2009.03.28 | 2013.03.23 | WaterIsotopes.org |
| RIZE                     | 41.0244 | 40.5200  | 136.0000  | 2008.07.15 | 2016.12.15 | GNIP              |
| RJAZAN                   | 54.6167 | 39.7167  | 135.0000  | 1981.01.15 | 1983.12.15 | GNIP              |
| ROCCAMONFINA             | 41.2833 | 13.9833  | 620.0000  | 2000.10.31 | 2000.10.31 | WaterIsotopes.org |

|                                     |         |          |           |            |            |                   |
|-------------------------------------|---------|----------|-----------|------------|------------|-------------------|
| Rokkasyo                            | 40.5700 | 141.2100 | 30.0000   | 2013.02.01 | 2013.12.27 | WaterIsotopes.org |
| ROORKEE                             | 29.8678 | 77.8939  | 274.0000  | 2003.07.15 | 2006.10.15 | GNIP              |
| ROSIA MONTANA                       | 46.3000 | 23.1300  | 0.0000    | 2015.01.15 | 2016.12.15 | GNIP              |
| ROSTOV-NA-DON<br>U                  | 47.2500 | 39.8200  | 77.0000   | 1981.01.15 | 1990.12.15 | GNIP              |
| ROVANIEMI                           | 66.4969 | 25.7552  | 107.0000  | 2003.11.15 | 2017.12.15 | GNIP              |
| RYORI                               | 39.0300 | 141.8100 | 260.0000  | 1980.01.15 | 2006.09.15 | GNIP              |
| S. GEMINI                           | 42.6167 | 12.5500  | 350.0000  | 2001.02.28 | 2001.02.28 | WaterIsotopes.org |
| S. PELLEGRINO<br>IN ALPE            | 44.7333 | 9.9167   | 1520.0000 | 1999.12.31 | 1999.12.31 | WaterIsotopes.org |
| S.Anna di Stazzema                  | 43.9746 | 10.2727  |           | 2014.01.01 | 2018.12.01 | References        |
| Saalfelden, HZB-Nr.<br>103929       | 47.4349 | 12.8509  | 795.0000  | 2007.01.15 | 2013.12.15 | WaterIsotopes.org |
| SABAUDIA                            | 41.3000 | 13.0167  | 17.0000   | 2001.03.31 | 2001.03.31 | WaterIsotopes.org |
| Saga                                | 33.1500 | 130.1900 | 5.0000    | 2013.02.01 | 2013.12.21 | WaterIsotopes.org |
| SAGAR                               | 23.8261 | 78.7625  | 551.0000  | 2003.07.15 | 2005.07.15 | GNIP              |
| SAINT<br>CATHRENE                   | 28.6800 | 34.1000  | 1350.0000 | 2001.03.15 | 2001.04.15 | GNIP              |
| Sakai                               | 34.3200 | 135.2700 | 10.0000   | 2013.02.01 | 2014.01.01 | WaterIsotopes.org |
| SALEHARD                            | 66.5300 | 66.5300  | 16.0000   | 1996.10.31 | 2000.12.31 | WaterIsotopes.org |
| SALEKHARD                           | 66.5333 | 66.6667  | 16.0000   | 1996.01.15 | 2000.12.15 | GNIP              |
| SALLENT DE<br>GALLEGO - LA<br>SARRA | 42.7897 | -0.3290  | 1460.0000 | 2013.01.15 | 2015.12.15 | GNIP              |
| SALUGGIA                            | 45.2333 | 8.0333   | 194.0000  | 2000.10.15 | 2001.10.15 | GNIP              |
| SAN PELLEGRINO<br>IN ALPE           | 44.1890 | 10.4763  | 1520.0000 | 1993.03.15 | 2002.02.15 | GNIP              |
| San Pellegrino in<br>Alpe           | 44.1893 | 10.4805  |           | 1993.03.01 | 2002.02.01 | References        |
| Sanchalukou                         | 37.4300 | 101.5500 |           | 2021.11.27 | 2021.11.27 | Measured<br>data  |
| SANTA CRUZ DE<br>TENERIFE           | 28.4634 | -16.2553 | 35.0000   | 2000.02.15 | 2015.12.15 | GNIP              |
| SANTA MARIA DI<br>LEUCA             | 39.7964 | 18.3686  | 30.0000   | 1999.10.31 | 1999.10.31 | WaterIsotopes.org |
| SANTANDER                           | 43.4911 | -3.8006  | 52.0000   | 2000.02.15 | 2015.12.15 | GNIP              |
| SARATOV                             | 51.5667 | 46.0333  | 166.0000  | 1981.01.15 | 1984.09.15 | GNIP              |

|                          |         |          |           |            |            |                   |
|--------------------------|---------|----------|-----------|------------|------------|-------------------|
| SARNICO                  | 45.6667 | 9.9500   | 197.0000  | 1999.01.31 | 1999.01.31 | WaterIsotopes.org |
| SASSARI                  | 40.7272 | 8.5603   | 225.0000  | 2000.01.31 | 2000.01.31 | WaterIsotopes.org |
| SATKHIRA                 | 22.7167 | 89.0833  | 10.0000   | 2015.04.15 | 2018.09.15 | GNIP              |
| SCERNI                   | 42.6333 | 14.0333  | 287.0000  | 2001.09.30 | 2001.09.30 | WaterIsotopes.org |
| SCHLESWIG                | 54.5275 | 9.5486   | 43.0000   | 1997.06.15 | 2013.12.15 | GNIP              |
| Schneealpe,<br>Lurgbauer | 47.7111 | 15.6369  |           | 2005.06.04 | 2005.08.11 | WaterIsotopes.org |
| SEEHAUSEN                | 52.8911 | 11.7294  | 21.0000   | 1997.06.15 | 2013.12.15 | GNIP              |
| Sendai                   | 38.1600 | 140.5200 | 50.0000   | 2013.02.01 | 2013.12.31 | WaterIsotopes.org |
| Sera                     | 34.3500 | 133.3000 | 400.0000  | 2013.02.10 | 2013.12.20 | WaterIsotopes.org |
| Seto                     | 35.1200 | 137.1000 | 304.0000  | 2013.02.01 | 2014.01.06 | WaterIsotopes.org |
| Sevan                    | 40.5658 | 45.0083  | 1937.0000 | 2014.07.05 | 2015.04.20 | WaterIsotopes.org |
| SGD                      | 36.5213 | 138.3497 | 1322.0000 | 2010.07.15 | 2015.06.15 | WaterIsotopes.org |
| SGD2                     | 36.5317 | 138.3250 | 1249.0000 | 2010.07.15 | 2015.06.15 | WaterIsotopes.org |
| Shangchigou              | 37.6300 | 101.8500 |           | 2021.11.27 | 2021.11.27 | Measured data     |
| SHB                      | 50.2500 | 106.2100 | 626.0000  | 2002.11.01 | 2003.09.01 | WaterIsotopes.org |
| SHG                      | 36.7108 | 138.4947 | 1594.0000 | 2010.07.15 | 2015.06.15 | WaterIsotopes.org |
| SHIJIAZHUANG             | 38.0333 | 114.4167 | 80.0000   | 1990.01.15 | 2003.11.15 | GNIP              |
| SHILLONG                 | 25.5700 | 91.8800  | 1598.0000 | 1969.01.15 | 1978.10.15 | GNIP              |
| Shirahama                | 33.4100 | 135.2000 | 10.0000   | 2013.02.01 | 2013.12.12 | WaterIsotopes.org |
| Shizuoka                 | 34.5800 | 138.2200 | 30.0000   | 2013.02.01 | 2014.01.03 | WaterIsotopes.org |
| SIENA                    | 43.3167 | 11.3500  | 322.0000  | 2002.02.28 | 2002.02.28 | WaterIsotopes.org |
| Siena                    | 43.3140 | 11.3314  |           | 1998.01.01 | 2002.02.01 | References        |
| Simf                     | 44.9800 | 34.1500  |           | 2009.11.01 | 2011.12.01 | References        |
| SINGAPORE                | 1.3500  | 103.9000 | 32.0000   | 1972.12.15 | 1975.12.15 | GNIP              |
| SINOP                    | 42.0250 | 35.1583  | 32.0000   | 2008.07.15 | 2016.12.15 | GNIP              |
| SION                     | 46.2203 | 7.3385   | 482.0000  | 1994.07.15 | 2017.11.15 | GNIP              |
| SIRACUSA                 | 37.0667 | 15.3000  | 17.0000   | 2001.01.31 | 2001.01.31 | WaterIsotopes.org |

|                   |         |          |           |            |            |                       |
|-------------------|---------|----------|-----------|------------|------------|-----------------------|
|                   |         |          |           |            |            | es.org                |
| Sisian            | 39.5083 | 46.0336  | 1580.0000 | 2014.08.22 | 2015.06.27 | WaterIsotop<br>es.org |
| SON LA            | 21.3200 | 103.9100 | 600.0000  | 2017.04.15 | 2018.12.15 | GNIP                  |
| SP-12             | 45.0522 | 33.9753  |           | 2012.01.01 | 2015.12.08 | References            |
| ST. GALLEN        | 47.4269 | 9.4008   | 779.0000  | 2004.01.15 | 2019.12.15 | GNIP                  |
| ST. PETERSBURG    | 59.9667 | 30.3000  | 4.0000    | 1981.01.15 | 1990.03.15 | GNIP                  |
| St.2 Ploneralm    | 46.6969 | 13.0407  | 1625.0000 | 1995.01.01 | 1995.12.01 | WaterIsotop<br>es.org |
| St.3 Buschgrede   | 46.6845 | 13.0341  | 1260.0000 | 1995.01.01 | 1995.12.01 | WaterIsotop<br>es.org |
| St.4 Hanser       | 46.6736 | 13.0341  | 910.0000  | 1995.01.01 | 1995.10.01 | WaterIsotop<br>es.org |
| St.6 Dellach/Drau | 46.7414 | 13.0833  | 627.0000  | 1995.01.01 | 1995.09.01 | WaterIsotop<br>es.org |
| STARA LESNA       | 49.1362 | 20.3065  | 721.0000  | 1991.08.15 | 1992.02.15 | GNIP                  |
| STUTTGART         | 48.8281 | 9.2000   | 314.0000  | 1990.01.15 | 2013.12.15 | GNIP                  |
| SUWIEDA           | 32.7056 | 36.5700  | 1020.0000 | 1989.12.15 | 1993.04.15 | GNIP                  |
| Suzhou District   | 34.4775 | 100.2390 |           | 2021.05.18 | 2022.04.30 | Measured<br>data      |
| SVYATOHIRSK       | 49.0400 | 37.5770  | 66.0000   | 2015.04.15 | 2016.12.15 | GNIP                  |
| SWA               | 36.0455 | 138.1087 | 760.0000  | 2010.07.15 | 2015.06.15 | WaterIsotop<br>es.org |
| SYLHET            | 24.9100 | 91.8453  | 20.0000   | 2009.05.15 | 2018.08.15 | GNIP                  |
| TAASTRUP          | 55.6700 | 12.3000  | 28.0000   | 1965.11.15 | 1971.03.15 | GNIP                  |
| Taipei(Taiwan)    | 25.1638 | 121.4750 | 365.0000  | 1997.06.30 | 1998.12.31 | WaterIsotop<br>es.org |
| Taiwan_ALS        | 23.5100 | 120.8100 | 2413.0000 | 2002.05.01 | 2006.11.01 | WaterIsotop<br>es.org |
| Taiwan_BL         | 24.2300 | 121.3200 | 2350.0000 | 2005.06.01 | 2008.01.01 | WaterIsotop<br>es.org |
| Taiwan_CY         | 23.4800 | 120.4600 | 27.0000   | 2002.05.01 | 2005.09.01 | WaterIsotop<br>es.org |
| Taiwan_HC         | 24.7500 | 121.0000 | 34.0000   | 2003.01.01 | 2004.12.01 | WaterIsotop<br>es.org |
| Taiwan_HL         | 23.9700 | 121.6500 | 50.0000   | 2003.07.01 | 2006.05.01 | WaterIsotop<br>es.org |
| Taiwan_HY         | 23.3000 | 120.3200 | 69.0000   | 2002.05.01 | 2003.09.01 | WaterIsotop<br>es.org |
| Taiwan_IL         | 24.6800 | 121.8000 | 24.0000   | 1993.07.01 | 1994.09.01 | WaterIsotop<br>es.org |
| Taiwan_KH         | 22.6300 | 120.2700 | 2.0000    | 2005.12.01 | 2006.09.01 | WaterIsotop<br>es.org |



|                 |         |          |           |            |            |                   |
|-----------------|---------|----------|-----------|------------|------------|-------------------|
| Taiwan_KL       | 25.1300 | 121.7100 | 27.0000   | 2004.06.01 | 2006.05.01 | WaterIsotopes.org |
| Taiwan_LS       | 24.2700 | 121.1600 | 1980.0000 | 2003.06.01 | 2004.09.01 | WaterIsotopes.org |
| Taiwan_MG       | 22.6700 | 120.6900 | 740.0000  | 2005.07.01 | 2006.06.01 | WaterIsotopes.org |
| Taiwan_PL       | 23.9700 | 120.9800 | 732.0000  | 1999.04.01 | 2002.01.01 | WaterIsotopes.org |
| Taiwan_PT       | 22.0300 | 120.6900 | 54.0000   | 2006.01.01 | 2007.11.01 | WaterIsotopes.org |
| Taiwan_TC       | 24.1200 | 120.6800 | 34.0000   | 2001.06.01 | 2007.10.01 | WaterIsotopes.org |
| Taiwan_TD       | 22.8400 | 121.0900 | 250.0000  | 2004.05.01 | 2007.11.01 | WaterIsotopes.org |
| Taiwan_TP       | 24.9800 | 121.5100 | 5.0000    | 2004.03.01 | 2006.12.01 | WaterIsotopes.org |
| Taiwan_TT       | 23.9900 | 120.6900 | 75.0000   | 2001.07.01 | 2006.11.01 | WaterIsotopes.org |
| Taiwan_TY       | 24.9500 | 121.0200 | 105.0000  | 2004.01.01 | 2006.11.01 | WaterIsotopes.org |
| Taiwan_WL       | 24.3500 | 121.3100 | 1800.0000 | 2006.12.01 | 2008.12.01 | WaterIsotopes.org |
| Taiwan_YL       | 23.3300 | 121.3100 | 130.0000  | 2005.01.01 | 2007.08.01 | WaterIsotopes.org |
| Taizhou         | 30.2674 | 120.1528 |           | 2020.12.14 | 2022.03.12 | Measured data     |
| Takamatsu       | 34.2000 | 134.2000 | 10.0000   | 2013.02.01 | 2013.12.12 | WaterIsotopes.org |
| TAMBOV          | 52.7333 | 41.4667  | 139.0000  | 1982.08.15 | 1983.12.15 | GNIP              |
| TARQUINIA       | 42.2500 | 11.7500  | 133.0000  | 2001.05.31 | 2001.05.31 | WaterIsotopes.org |
| TARSOGNO        | 44.4500 | 9.6167   | 768.0000  | 2001.03.31 | 2001.03.31 | WaterIsotopes.org |
| TARTU           | 58.2639 | 26.4614  | 70.0000   | 2013.07.15 | 2018.12.15 | GNIP              |
| TASHKENT        | 41.2700 | 69.2700  | 428.0000  | 1971.01.15 | 1971.12.15 | GNIP              |
| TAWAU - AIRPORT | 4.3170  | 118.1210 | 15.0000   | 2007.07.15 | 2008.12.15 | GNIP              |
| TBILISI         | 41.7500 | 44.7667  | 427.0000  | 2008.04.15 | 2018.12.15 | GNIP              |
| TEHERAN EAST    | 35.7400 | 51.5800  | 1350.0000 | 2000.10.15 | 2004.05.15 | GNIP              |
| TEHRI           | 30.3528 | 78.4833  | 640.0000  | 2004.07.15 | 2006.10.15 | GNIP              |
| TERNEJ          | 45.0300 | 136.6700 | 68.0000   | 1996.05.31 | 2000.12.31 | WaterIsotopes.org |
| TERNEY          | 45.0000 | 136.6000 | 68.0000   | 1996.04.15 | 2000.11.15 | GNIP              |

|                         |         |          |           |            |            |                   |
|-------------------------|---------|----------|-----------|------------|------------|-------------------|
| THESSALONIKI            | 40.6700 | 22.9600  | 32.0000   | 2000.10.15 | 2003.08.15 | GNIP              |
| THONON-LES-BAINS        | 46.3722 | 6.4708   | 385.0000  | 1992.02.15 | 2018.12.15 | GNIP              |
| TIANJIN                 | 39.1000 | 117.1667 | 3.0000    | 1988.04.15 | 2001.12.15 | GNIP              |
| Tianshui                | 34.5809 | 105.7249 |           | 2020.12.23 | 2021.06.29 | Measured data     |
| TIRUNELVELI             | 8.7278  | 77.7183  | 4.0000    | 2003.07.15 | 2004.10.15 | GNIP              |
| TKY                     | 36.1425 | 137.4223 | 1342.0000 | 2011.06.15 | 2013.12.15 | WaterIsotopes.org |
| TODI                    | 42.7833 | 12.4000  | 400.0000  | 2001.10.31 | 2001.10.31 | WaterIsotopes.org |
| Tokushima               | 34.4000 | 134.2900 | 10.0000   | 2013.02.01 | 2013.12.27 | WaterIsotopes.org |
| TOKYO                   | 35.6800 | 139.7700 | 4.0000    | 1973.01.15 | 1979.12.15 | GNIP              |
| Tongling                | 30.9200 | 117.8100 |           | 2021.02.18 | 2022.02.17 | Measured data     |
| Tongren County          | 35.5200 | 102.0180 |           | 2021.03.30 | 2021.10.26 | Measured data     |
| Tongwei                 | 35.2110 | 105.2422 |           | 2020.07.14 | 2021.09.05 | Measured data     |
| TOPOLNIKY               | 47.9601 | 17.8620  | 118.0000  | 1992.01.15 | 1992.02.15 | GNIP              |
| TORTOSA                 | 40.8203 | 0.4933   | 50.0000   | 2000.02.15 | 2015.11.15 | GNIP              |
| TOULOUSE (UNIV. ECOLAB) | 43.5583 | 1.4694   | 156.0000  | 2011.07.15 | 2012.12.15 | GNIP              |
| TRENT                   | 46.0667 | 11.1333  | 312.0000  | 1997.12.31 | 1997.12.31 | WaterIsotopes.org |
| TRIER                   | 49.7478 | 6.6581   | 265.0000  | 1990.01.15 | 2013.12.15 | GNIP              |
| TRIESTE                 | 45.6486 | 13.7800  | 14.0000   | 1997.12.31 | 2003.12.15 | WaterIsotopes.org |
| UDH                     | 47.3200 | 110.6700 | 1033.0000 | 2002.10.01 | 2003.09.01 | WaterIsotopes.org |
| UDINE                   | 46.0619 | 13.2422  | 113.0000  | 1996.12.31 | 1996.12.31 | WaterIsotopes.org |
| UHLIRSKA                | 50.8325 | 15.1478  | 823.0000  | 2006.05.15 | 2018.12.15 | GNIP              |
| UIT_001                 | 69.6800 | 18.9600  | 73.0000   | 2019.09.06 | 2021.09.05 | WaterIsotopes.org |
| Uji                     | 34.5400 | 135.4800 | 25.0000   | 2013.02.01 | 2013.07.31 | WaterIsotopes.org |
| ULAANBAATAR             | 47.9333 | 106.9833 | 1338.0000 | 1990.06.15 | 2001.03.15 | GNIP              |
| UMN-EL-JEMAL            | 32.3055 | 36.2447  | 575.0000  | 1968.11.15 | 1969.04.15 | GNIP              |
| URBINO                  | 43.7167 | 12.6333  | 485.0000  | 2001.10.31 | 2001.10.31 | WaterIsotopes.org |
| Utsunomiya              | 36.3300 | 139.5400 | 115.0000  | 2013.02.01 | 2014.01.07 | WaterIsotopes.org |

|                                |         |          |           |            |            |                       |
|--------------------------------|---------|----------|-----------|------------|------------|-----------------------|
|                                |         |          |           |            |            | es.org                |
| UTTARKASHI                     | 30.7292 | 78.4467  | 1140.0000 | 2004.06.15 | 2006.10.15 | GNIP                  |
| VAIRANO                        | 41.3333 | 14.1333  | 155.0000  | 1998.08.31 | 1998.09.30 | WaterIsotop<br>es.org |
| VALENCIA                       | 39.4806 | -0.3664  | 11.0000   | 2000.03.15 | 2010.12.15 | GNIP                  |
| VALENTIA                       | 51.9300 | -10.2500 | 9.0000    | 1990.01.15 | 2018.12.15 | GNIP                  |
| VALLADOLID                     | 41.6408 | -4.7544  | 735.0000  | 2000.02.15 | 2015.12.15 | GNIP                  |
| VALLE<br>AGRICOLA              | 41.4333 | 14.2500  | 680.0000  | 1998.08.31 | 1998.08.31 | WaterIsotop<br>es.org |
| Vanadzor                       | 40.8386 | 44.4361  | 1376.0000 | 2014.07.01 | 2015.04.22 | WaterIsotop<br>es.org |
| VERONA                         | 45.4500 | 11.0000  | 59.0000   | 1997.12.31 | 1997.12.31 | WaterIsotop<br>es.org |
| VIENNA                         | 48.2486 | 16.3564  | 198.0000  | 1990.02.15 | 2020.12.15 | GNIP                  |
| VILLACHER ALPE                 | 46.6031 | 13.6714  | 2156.0000 | 1990.01.15 | 2002.12.15 | GNIP                  |
| VILSANDI                       | 58.3828 | 21.8142  | 6.0000    | 2013.07.15 | 2018.12.15 | GNIP                  |
| VOLOGDA                        | 59.2833 | 39.8667  | 118.0000  | 1981.01.15 | 1983.12.15 | GNIP                  |
| Wadi Hanifa,<br>Riyadh         | 24.6200 | 46.6600  | 612.0000  | 1974.03.28 | 1974.03.28 | WaterIsotop<br>es.org |
| WALLINGFORD                    | 51.6000 | -1.1000  | 48.0000   | 1990.01.15 | 2015.12.15 | GNIP                  |
| WASSERKUPPE<br>RHOEN           | 50.4972 | 9.9428   | 921.0000  | 1990.01.15 | 2013.12.15 | GNIP                  |
| Weather station<br>Burabay new | 53.1296 | 70.2799  | 309.0000  | 2016.04.24 | 2016.05.08 | WaterIsotop<br>es.org |
| WEIL AM RHEIN                  | 47.5958 | 7.5944   | 249.0000  | 1990.01.15 | 2013.12.15 | GNIP                  |
| WELLAMPITIYA                   | 6.9506  | 79.8795  | 5.0000    | 2009.01.15 | 2018.12.15 | GNIP                  |
| WIERINGERWERF                  | 52.8000 | 5.0500   | -4.0000   | 1990.01.15 | 1992.04.15 | GNIP                  |
| WROCLAW                        | 51.1165 | 17.0295  | 118.0000  | 2004.05.15 | 2009.05.15 | GNIP                  |
| WUERZBURG                      | 49.7703 | 9.9578   | 268.0000  | 1990.01.15 | 2013.12.15 | GNIP                  |
| Wuhai                          | 39.6700 | 106.8200 |           | 2021.04.24 | 2021.07.16 | Measured<br>data      |
| WUHAN                          | 30.6200 | 114.1300 | 23.0000   | 1992.06.15 | 1998.05.15 | GNIP                  |
| WULUMUQI                       | 43.7800 | 87.6200  | 918.0000  | 1986.02.15 | 2003.12.15 | GNIP                  |
| Wuqia                          | 39.7200 | 75.2500  |           | 2012.08.01 | 2019.03.01 | References            |
| XIAN                           | 34.3000 | 108.9300 | 397.0000  | 1985.09.15 | 1992.07.15 | GNIP                  |
| Xi'an                          | 34.2700 | 108.9500 |           | 2020.07.21 | 2020.10.13 | Measured<br>data      |
| Xianxi                         | 28.3143 | 109.7400 |           | 2021.11.27 | 2022.05.19 | Measured<br>data      |
| Xichang                        | 27.8952 | 102.2641 |           | 2021.04.28 | 2021.08.13 | Measured<br>data      |
| Xinghai County                 | 35.5900 | 99.9900  |           | 2021.03.27 | 2021.11.03 | Measured<br>data      |

|                               |         |          |           |            |            |                   |
|-------------------------------|---------|----------|-----------|------------|------------|-------------------|
| Xiyingwugou                   | 37.5300 | 102.1000 |           | 2019.10.15 | 2021.11.27 | Measured data     |
| Ya'an                         | 30.3000 | 103.0000 |           | 2020.08.06 | 2020.10.14 | Measured data     |
| Yabulai weather station (YBL) | 39.3000 | 102.7000 | 1250.0000 | 2013.07.18 | 2016.07.24 | WaterIsotopes.org |
| YAKUTSK                       | 62.0800 | 129.7500 | 107.0000  | 1996.10.15 | 2000.12.15 | GNIP              |
| Yamagata                      | 38.1200 | 140.1800 | 130.0000  | 2013.01.30 | 2013.12.30 | WaterIsotopes.org |
| Yamaguchi                     | 34.8000 | 131.2800 | 20.0000   | 2013.01.31 | 2013.12.27 | WaterIsotopes.org |
| Yangkou cave                  | 29.0300 | 107.1800 | 2140.0000 | 2012.03.01 | 2016.12.01 | WaterIsotopes.org |
| YANGOON                       | 16.7700 | 96.1700  | 20.0000   | 1961.05.15 | 1963.12.15 | GNIP              |
| YANTAI                        | 37.5300 | 121.4000 | 47.0000   | 1986.03.15 | 1991.04.15 | GNIP              |
| YCR                           | 45.0522 | 33.9753  |           | 2010.10.01 | 2010.12.01 | References        |
| Yerevan                       | 40.2003 | 44.5183  | 1134.0000 | 2014.07.06 | 2015.06.17 | WaterIsotopes.org |
| Yichun                        | 27.8000 | 114.3800 |           | 2021.12.26 | 2022.04.30 | Measured data     |
| YINCHUAN                      | 38.4833 | 106.2167 | 1112.0000 | 1988.02.15 | 2000.08.15 | GNIP              |
| Yokohama                      | 35.2800 | 139.3500 | 60.0000   | 2013.02.01 | 2013.12.31 | WaterIsotopes.org |
| Yumen                         | 34.4775 | 100.2390 |           | 2021.06.15 | 2022.02.17 | Measured data     |
| ZADAR                         | 44.1200 | 15.2400  | 5.0000    | 2000.09.15 | 2003.12.15 | GNIP              |
| ZAGREB-GRIC                   | 45.8167 | 15.9833  | 157.0000  | 1996.01.15 | 2003.12.15 | GNIP              |
| ZARAGOZA AEROPUERTO           | 41.6606 | -1.0042  | 263.0000  | 2000.03.15 | 2015.11.15 | GNIP              |
| ZAVIZAN-VELEBIT               | 44.8167 | 14.9833  | 1594.0000 | 2000.09.15 | 2003.12.15 | GNIP              |
| Zeku                          | 35.0352 | 101.4644 |           | 2021.01.20 | 2021.11.15 | Measured data     |
| ZHANGYE                       | 38.9300 | 100.4300 | 1483.0000 | 1990.01.15 | 2003.11.15 | GNIP              |
| ZHENGZHOU                     | 34.7200 | 113.6500 | 110.0000  | 1986.02.15 | 1992.07.15 | GNIP              |
| ZINNWALD                      | 50.7311 | 13.7514  | 877.0000  | 2001.02.15 | 2014.02.15 | GNIP              |
| ZITTAU                        | 50.9000 | 14.8000  | 240.0000  | 2012.11.15 | 2018.12.15 | GNIP              |
| ZUNYI                         | 27.7000 | 106.8800 | 844.0000  | 1986.02.15 | 1992.05.15 | GNIP              |

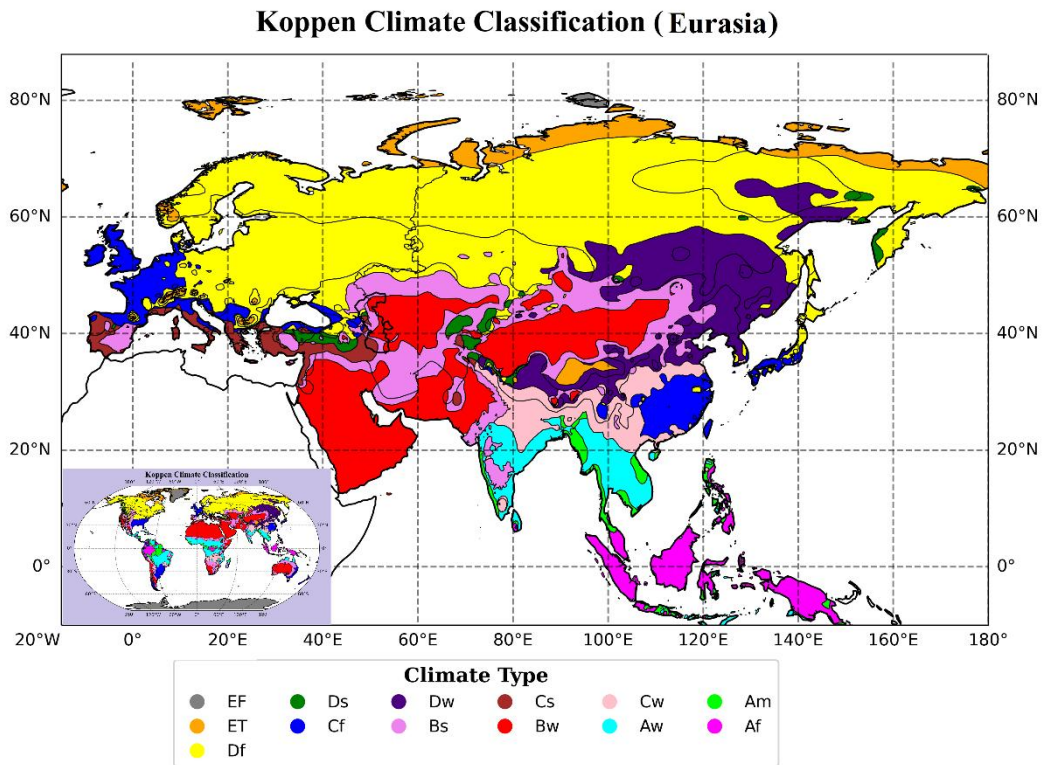

**Figure S1** Distribution of climate types in Eurasia

**Table S2** Name of climate type

| Cli_Zone      | CliType | CliType                        |
|---------------|---------|--------------------------------|
| Tropical (A)  | Aw      | Tropical Sparse Forest Climate |
|               | Af      | Tropical Rainforest Climate    |
|               | Am      | Tropical Monsoon Climate       |
| Arid (B)      | Bs      | Grassland Climate              |
|               | Bw      | Desert Climate                 |
| Temperate (C) | Cf      | Humid Warm Climate             |
|               | Cs      | Summer Dry Warm Climate        |
|               | Cw      | Winter Dry Warm Climate        |
| Cold (D)      | Df      | Humid Cold Temperate Climate   |
|               | Ds      | Subfrigid Continental Climate  |
|               | Dw      | Subfrigid Monsoon Climate      |
|               | Ds      | Subfrigid Continental Climate  |
|               | Df      | Humid Cold Temperate Climate   |
| Polar (E)     | ET      | Tundra Climate                 |
|               | EF      | Subarctic Climate              |

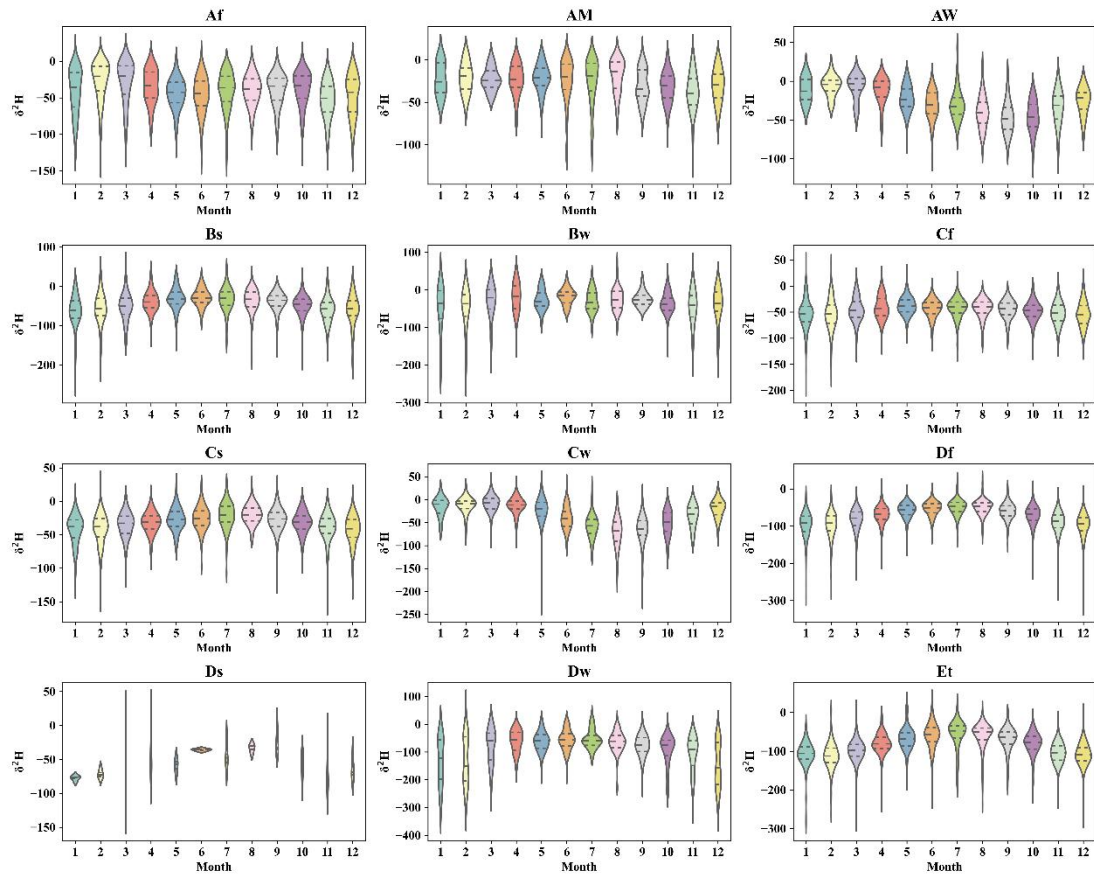

**Figure S2** Seasonal Distribution and Variations of Stable Isotopes in Precipitation( $\delta^2\text{H}$ )

**S4**

**Table S3** Random Forest Model Assessment Indicators

|                       | RMSE  | MAE   |
|-----------------------|-------|-------|
| $\delta^2\text{H}$    | 16.87 | 11.02 |
| $\delta^{18}\text{O}$ | 2.17  | 1.42  |
